# Supplementary material for: The socio-economic drivers of bushmeat consumption during the West African Ebola crisis
Source: PubMed Central journal article supplement (PMC5362244; doi:10.1371/journal.pntd.0005450), 2017-03-10
Supplement: pntd.0005450.s001.pdf [file pntd.0005450.s001.pdf]

## **S1.1 Data preparation for response variables**

### *Frequency of bushmeat consumption*

Respondents could choose among eight categories to specify how frequently they consumed bushmeat: 'with every meal', 'every day', 'every second day', 'twice a week', 'once a week', 'once a month', '< once a month', 'never'. We reduced the number of levels by moving the number of respondents who said 'never' (n = 210) to '< once a month' because the level 'never' was absent as an optional response to the retrospective question in the questionnaire; hence, we needed to match the response levels between the two time periods. The categories were first transformed into ordered factors, from the lowest to the highest frequency of consumption, and then into ranks.

### *Proportion of people in the community who preferred to eat bushmeat*

Respondents could choose among five options to specify what proportion of people in their community or nearby communities they thought preferred to eat bushmeat before and during the Ebola crisis: 'very few people', 'half', 'more than half', 'everybody', and 'other'. We moved the number of respondents who selected the option 'other' and then specified 'nobody', to the level called 'very few people', as it was the most proximate level. We created an additional level for respondents who selected the option 'other' and then specified 'few people' because a level between 'very few people' and 'half' was absent. The categories were first transformed into ordered factors, from the lowest to the highest proportion of the community who preferred to eat bushmeat, and then into ranks.

### *Number of food items consumed*

Respondents provided lists of food items that composed a typical meal on a typical day before and during the Ebola outbreak, which were transformed into count data to investigate changes in food diversity.

### *Number of food groups consumed*

We used the lists of food items that described a typical meal on a typical day before and during the crisis to create six food groups: staples, vegetables, fruits, meat, fish and seafood, and oil. To investigate changes in food diversity based on the number of food groups consumed, we converted these into count data.

### *Bushmeat preference*

Respondents were asked 'if there was a festivity to which you were invited, which type of meat would you prefer to eat?' if the answer was 'bushmeat', they were asked to specify the species in the consecutive question. We selected three of the most commonly preferred species (duikers, pangolins and monkeys), and ran separate models for each one. For each model we converted the ordinal data into binary data (e.g. pangolin was given the value of one, and all other bushmeat species the value of zero) to compare the likelihood of preference for each species before and during the crisis.

### *Meat prices*

Fish, bushmeat and domestic meat prices that were specified in US dollars were converted into Liberian dollars (LRD). The exchange rate at the time of the 2015 follow-up survey was 84 LRD for 1 USD [1].

## **S1.2 Data preparation for predictor variables**

### *Distance to roads and distance to settlements*

To control for an effect of the remoteness of interview locations we created two raster layers in ArcGIS [2], one for settlements and one for roads. Within each layer we calculated the Euclidean distance from each pixel to the closest road or settlement. The layers were converted into ASCII files, which contained the distance values for each pixel and were used for the statistical analysis in R [3]. To assess whether the two predictor variables were correlated we calculated the Spearman's rank correlation coefficient that showed only a weak correlation between the two variables (Spearman's  $\rho = 0.247$ ).

### *Occupation*

We divided the types of occupation into four categories: 'first' for agriculture and hunting, 'second' for industry and skilled labor, 'third' for services provided, and 'other' for unemployed or mixed categories.

### *Livestock consumption*

To obtain the amount of livestock and domestic animals (in kg) that were owned and consumed by the household, we multiplied the number of each type of animal slaughtered during the previous year with the average weight of the animal.

### *Crop consumption*

To estimate the amount of crops consumed by the household (in kg), we took the total production from the previous year and subtracted the amount reported for the total production that was sold. We assumed that this amount was consumed by the household.

### *Household size*

To control for household size, we summed the number of male and female members of the household from all age groups.

### *Bushmeat and domestic meat prices*

Meat prices that were specified in US dollars were converted into Liberian dollars (LRD). The exchange rate at the time of the 2015 follow-up survey was 84 LRD for 1 USD [1].

### *Meat types*

We collected prices for five types of domestic meat: chicken, beef, pork, sheep, and goat. For bushmeat, prices were given for 10 types of meat: monkey, porcupine, cane rat, water chevrotain, crocodile, antelope, red river hog, bay duiker, black duiker, and Maxwell's duiker.

## **S1.3 Model stability**

We assessed model stability by re-running the full models that excluded levels of the random effects one at a time, and comparing the estimated coefficients from the reduced models to the ones obtained from a model based on the full data set.

**Table S1.1** Original estimates, lower- and upper bounds of coefficients for each test predictor for models based on the full data set.

| Model/response                   | Predictor                              | Original estimate | Lower bound | Upper bound |
|----------------------------------|----------------------------------------|-------------------|-------------|-------------|
| Number of meals per day          | Intercept                              | 0.964             | 0.949       | -0.991      |
|                                  | Time period <sup>†</sup>               | -0.373            | -0.466      | -0.218      |
|                                  | Time period*income <sup>†</sup>        | 0.045             | 0.029       | 0.08        |
|                                  | Time period*literacy <sup>†</sup>      | -0.008            | -0.149      | 0.103       |
|                                  | Time period*education <sup>†</sup>     | 0.011             | -0.044      | 0.073       |
|                                  | Income <sup>‡</sup>                    | 0.004             | -0.009      | 0.019       |
|                                  | Literacy <sup>‡</sup>                  | -0.031            | -0.055      | 0.001       |
|                                  | Education <sup>‡</sup>                 | 0.024             | -0.001      | 0.037       |
|                                  | Perceived law enforcement <sup>‡</sup> | 0.006             | -0.016      | 0.017       |
|                                  | Ebola infections <sup>‡</sup>          | -0.052            | -0.094      | -0.015      |
|                                  | Age <sup>‡</sup>                       | 0.013             | -0.004      | 0.025       |
|                                  | Sex <sup>‡</sup>                       | -0.109            | -0.137      | -0.083      |
|                                  | No. of inhabitants <sup>‡</sup>        | 0.04              | 0.024       | 0.052       |
|                                  | Occupation, other <sup>‡</sup>         | -0.033            | -0.063      | -0.014      |
|                                  | Occupation, second <sup>‡</sup>        | 0.109             | 0.059       | 0.14        |
|                                  | Occupation, third <sup>‡</sup>         | 0.084             | 0.051       | 0.127       |
|                                  | Household size <sup>‡</sup>            | -0.026            | -0.036      | -0.016      |
|                                  | Crop consumption <sup>‡</sup>          | 0.059             | 0.04        | 0.071       |
|                                  | Distance from settlements <sup>‡</sup> | -0.01             | -0.022      | 0.001       |
|                                  | Distance from roads <sup>‡</sup>       | 0.000             | -0.016      | 0.019       |
| Bushmeat perception <sup>‡</sup> | -0.049                                 | -0.069            | -0.035      |             |

|                                                                     |                                        |        |        |        |
|---------------------------------------------------------------------|----------------------------------------|--------|--------|--------|
| Frequency of bushmeat consumption                                   | Intercept                              | 1.515  | 1.432  | 1.575  |
|                                                                     | Time period <sup>†</sup>               | -0.919 | -1.070 | -0.851 |
|                                                                     | Time period*income <sup>†</sup>        | 0.166  | 0.093  | 0.190  |
|                                                                     | Time period*literacy <sup>†</sup>      | -0.080 | -0.205 | 0.134  |
|                                                                     | Time period*education <sup>†</sup>     | -0.050 | -0.111 | 0.001  |
|                                                                     | Income <sup>‡</sup>                    | 0.024  | -0.009 | 0.055  |
|                                                                     | Literacy <sup>‡</sup>                  | 0.075  | 0.017  | 0.162  |
|                                                                     | Education <sup>‡</sup>                 | -0.035 | -0.064 | -0.019 |
|                                                                     | Perceived law enforcement <sup>‡</sup> | -0.093 | -0.119 | -0.068 |
|                                                                     | Ebola infections <sup>‡</sup>          | 0.032  | -0.006 | 0.086  |
|                                                                     | Age <sup>‡</sup>                       | -0.029 | -0.053 | -0.015 |
|                                                                     | Sex <sup>‡</sup>                       | 0.029  | -0.012 | 0.099  |
|                                                                     | No. of inhabitants <sup>‡</sup>        | -0.091 | -0.112 | -0.057 |
|                                                                     | Occupation, other <sup>‡</sup>         | -0.143 | -0.299 | -0.082 |
|                                                                     | Occupation, second <sup>‡</sup>        | -0.036 | -0.105 | 0.017  |
|                                                                     | Occupation, third <sup>‡</sup>         | 0.005  | -0.016 | 0.030  |
|                                                                     | Household size <sup>‡</sup>            | 0.003  | -0.034 | 0.046  |
|                                                                     | Livestock consumption <sup>‡</sup>     | 0.051  | 0.017  | 0.072  |
|                                                                     | Distance from settlements <sup>‡</sup> | 0.006  | -0.006 | 0.037  |
|                                                                     | Distance from roads <sup>‡</sup>       | 0.011  | -0.001 | 0.033  |
| Bushmeat perception <sup>‡</sup>                                    | -0.194                                 | -0.263 | -0.148 |        |
| Bushmeat prices <sup>‡</sup>                                        | -0.194                                 | -0.082 | -0.052 |        |
| Income*bushmeat prices <sup>‡</sup>                                 | 0.017                                  | 0.000  | 0.033  |        |
| Proportion of people in the community who preferred to eat bushmeat | Intercept                              | 1.182  | 1.105  | 1.359  |
|                                                                     | Time period <sup>†</sup>               | -1.119 | -1.553 | -0.884 |
|                                                                     | Time period*income <sup>†</sup>        | 0.293  | 0.240  | 0.581  |
|                                                                     | Time period*literacy <sup>†</sup>      | 0.249  | 0.140  | 0.355  |
|                                                                     | Time period*education <sup>†</sup>     | -0.206 | -0.268 | -0.150 |
|                                                                     | Income <sup>‡</sup>                    | -0.023 | -0.036 | -0.004 |
|                                                                     | Literacy <sup>‡</sup>                  | -0.018 | -0.047 | 0.019  |
|                                                                     | Education <sup>‡</sup>                 | 0.002  | -0.015 | 0.013  |
|                                                                     | Bushmeat prices <sup>‡</sup>           | -0.009 | -0.026 | 0.023  |
|                                                                     | Perceived law enforcement <sup>‡</sup> | -0.015 | -0.057 | 0.026  |
|                                                                     | Ebola infections <sup>‡</sup>          | 0.066  | 0.036  | 0.088  |
|                                                                     | Age <sup>‡</sup>                       | -0.006 | -0.020 | 0.002  |
|                                                                     | Sex <sup>‡</sup>                       | 0.160  | 0.079  | 0.246  |
|                                                                     | No. of inhabitants <sup>‡</sup>        | -0.048 | -0.061 | -0.026 |
|                                                                     | Occupation, other <sup>‡</sup>         | -0.099 | -0.176 | 0.031  |
|                                                                     | Occupation, second <sup>‡</sup>        | 0.010  | -0.024 | 0.060  |
|                                                                     | Occupation, third <sup>‡</sup>         | -0.004 | -0.041 | 0.015  |
|                                                                     | Household size <sup>‡</sup>            | 0.024  | 0.006  | 0.036  |
|                                                                     | Livestock consumption <sup>‡</sup>     | 0.003  | -0.003 | 0.022  |
|                                                                     | Distance from settlements <sup>‡</sup> | 0.004  | -0.028 | 0.024  |
| Distance from roads <sup>‡</sup>                                    | -0.001                                 | -0.009 | 0.021  |        |
| Bushmeat perception <sup>‡</sup>                                    | -0.006                                 | -0.046 | 0.035  |        |
| Income*bushmeat prices <sup>‡</sup>                                 | -0.042                                 | -0.060 | -0.031 |        |

|                                     |                                        |        |        |        |
|-------------------------------------|----------------------------------------|--------|--------|--------|
| Number of food items consumed       | Intercept                              | 1.408  | 1.250  | 1.466  |
|                                     | Time period <sup>†</sup>               | -0.156 | -0.242 | -0.083 |
|                                     | Time period*income <sup>†</sup>        | 0.035  | 0.017  | 0.066  |
|                                     | Time period*literacy <sup>†</sup>      | 0.033  | -0.008 | 0.127  |
|                                     | Time period*education <sup>†</sup>     | -0.059 | -0.097 | -0.041 |
|                                     | Income <sup>‡</sup>                    | 0.046  | -0.024 | 0.094  |
|                                     | Literacy <sup>‡</sup>                  | 0.085  | 0.031  | 0.165  |
|                                     | Education <sup>‡</sup>                 | 0.005  | -0.044 | 0.038  |
|                                     | Bushmeat prices <sup>‡</sup>           | 0.041  | 0.031  | 0.049  |
|                                     | Domestic meat prices <sup>‡</sup>      | -0.037 | -0.063 | -0.014 |
|                                     | Perceived law enforcement <sup>‡</sup> | 0.006  | -0.006 | 0.034  |
|                                     | Ebola infections <sup>‡</sup>          | 0.008  | -0.025 | 0.033  |
|                                     | Age <sup>‡</sup>                       | -0.002 | -0.019 | 0.039  |
|                                     | Sex <sup>‡</sup>                       | -0.048 | -0.092 | -0.020 |
|                                     | No. of inhabitants <sup>‡</sup>        | 0.000  | -0.012 | 0.023  |
|                                     | Occupation, other <sup>‡</sup>         | 0.076  | 0.040  | 0.139  |
|                                     | Occupation, second <sup>‡</sup>        | 0.048  | 0.027  | 0.092  |
|                                     | Occupation, third <sup>‡</sup>         | 0.082  | 0.044  | 0.103  |
|                                     | Household size <sup>‡</sup>            | 0.010  | -0.003 | 0.018  |
|                                     | Distance from settlements <sup>‡</sup> | 0.004  | -0.005 | 0.022  |
|                                     | Distance from roads <sup>‡</sup>       | 0.013  | -0.019 | 0.035  |
|                                     | Bushmeat perception <sup>‡</sup>       | -0.061 | -0.079 | -0.038 |
| Income*bushmeat prices <sup>‡</sup> | -0.018                                 | -0.029 | 0.001  |        |
| Income*domestic prices <sup>‡</sup> | 0.021                                  | 0.009  | 0.032  |        |
| Number of food groups consumed      | Intercept                              | 1.191  | 1.106  | 1.273  |
|                                     | Time period <sup>†</sup>               | -0.045 | -0.109 | 0.012  |
|                                     | Time period*income <sup>†</sup>        | -0.014 | -0.030 | 0.011  |
|                                     | Time period*literacy <sup>†</sup>      | -0.038 | -0.086 | 0.007  |
|                                     | Time period*education <sup>†</sup>     | -0.011 | -0.034 | 0.007  |
|                                     | Income <sup>‡</sup>                    | 0.062  | 0.000  | 0.132  |
|                                     | Literacy <sup>‡</sup>                  | 0.056  | 0.036  | 0.093  |
|                                     | Education <sup>‡</sup>                 | -0.016 | -0.052 | -0.006 |
|                                     | Bushmeat prices <sup>‡</sup>           | 0.036  | 0.028  | 0.051  |
|                                     | Domestic meat prices <sup>‡</sup>      | -0.031 | -0.062 | -0.014 |
|                                     | Perceived law enforcement <sup>‡</sup> | 0.017  | -0.035 | 0.085  |
|                                     | Ebola infections <sup>‡</sup>          | -0.007 | -0.063 | 0.019  |
|                                     | Age <sup>‡</sup>                       | 0.000  | -0.008 | 0.022  |
|                                     | Sex <sup>‡</sup>                       | -0.118 | -0.173 | -0.043 |
|                                     | No. of inhabitants <sup>‡</sup>        | 0.012  | 0.000  | 0.038  |
|                                     | Occupation, other <sup>‡</sup>         | -0.020 | -0.062 | 0.029  |
|                                     | Occupation, second <sup>‡</sup>        | -0.024 | -0.046 | 0.030  |
|                                     | Occupation, third <sup>‡</sup>         | 0.001  | -0.022 | 0.019  |
|                                     | Household size <sup>‡</sup>            | 0.014  | 0.002  | 0.022  |
|                                     | Distance from settlements <sup>‡</sup> | -0.006 | -0.019 | 0.007  |
|                                     | Distance from roads <sup>‡</sup>       | 0.019  | 0.003  | 0.057  |
|                                     | Bushmeat perception <sup>‡</sup>       | -0.008 | -0.029 | 0.015  |
| Income*bushmeat prices <sup>‡</sup> | -0.024                                 | -0.040 | -0.012 |        |
| Income*domestic prices <sup>‡</sup> | 0.014                                  | 0.006  | 0.019  |        |

|                              |                                       |                  |                  |                 |
|------------------------------|---------------------------------------|------------------|------------------|-----------------|
| Preference for duiker meat   | Intercept<br>Time period <sup>†</sup> | -1.454<br>0.278  | -1.694<br>0.000  | 0.000<br>0.360  |
| Preference for monkey meat   | Intercept<br>Time period <sup>†</sup> | -2.512<br>-0.916 | -2.734<br>-1.047 | 0.000<br>0.000  |
| Preference for pangolin meat | Intercept<br>Time period <sup>†</sup> | -1.599<br>-0.121 | -1.757<br>-0.223 | -1.524<br>0.025 |
| Domestic meat prices         | Intercept<br>Time period <sup>†</sup> | 4.275<br>0.179   | 4.252<br>0.148   | 4.304<br>0.214  |
| Bushmeat prices              | Intercept<br>Time period <sup>†</sup> | 6.844<br>0.155   | 6.704<br>0.087   | 6.96<br>0.253   |
| Fish prices                  | Intercept<br>Time period <sup>†</sup> | 4.275<br>0.179   | 4.252<br>0.148   | 4.304<br>0.214  |

<sup>†</sup>Included as a test predictor

<sup>‡</sup>Included as a fixed-effect control predictor

## References

1. Oanda Currency Converter. Available from: <http://www.oanda.com/currency/converter/>
2. Environmental Systems Research Institute (ESRI). ArcGIS Desktop: Release 10.1. 2011. Redlands.
3. R Core Team. R: A language and environment for statistical computing. Vienna: R Foundation for Statistical Computing; 2015. Available from: <https://www.R-project.org/>
