# Supplementary material for: The socio-economic drivers of bushmeat consumption during the West African Ebola crisis
Source: PLoS Negl Trop Dis. 2017 Mar 10;11(3):e0005450. doi: 10.1371/journal.pntd.0005450 (PMC5362244; doi:10.1371/journal.pntd.0005450)
Supplement: S2 Data — (XLSX) [file pntd.0005450.s004.xlsx]

## Sheet: Meat preference.2010-2012
id_before	meatpref_before	species_before
Bah_Ta_1	chicken	NA
Bah_Ta_2	NA	NA
Bah_Ta_3	bushmeat	red river hog
Bah_Ta_4	chicken/goat	NA
Bah_Ta_5	goat	NA
Bah_Ta_6	NA	NA
Bainakpale_1	goat	NA
Bainakpale_2	goat	NA
Bainakpale_3	chicken	NA
Bassa_town_1	bushmeat	duiker
Bassa_town_2	bushmeat	water chevrotain
Bhai_tarway_1	fish	NA
Bhai_tarway_2	beef	NA
Biawu_1	chicken/goat	NA
Biawu_2	chicken	NA
Biawu_3	chicken/goat	NA
Biawu_4	chicken	NA
Biawu_5	bushmeat	duiker
Biawu_6	chicken/goat	NA
Bilitanda_1	chicken	NA
Bilitanda_2	goat	NA
Bilitanda_3	bushmeat	pangolin
Bilitanda_4	chicken	NA
Bilitanda_5	chicken	NA
Camp_one_1	bushmeat	pangolin
Camp_one_2	goat	NA
Camp_one_3	duck	NA
Camp_one_4	bushmeat	pangolin
Chebioh_1	bushmeat	porcupine
Chebioh_2	bushmeat/cane rat	NA
Chebioh_3	bushmeat	red river hog
Chebioh_4	sheep	NA
Chebioh_5	fish	NA
Dabu_1	chicken	NA
Dabu_2	chicken	NA
Dabu_3	chicken/goat	NA
Dabu_4	chicken	NA
Dabu_5	chicken	NA
Darmah_1	bushmeat	duiker
Darmah_2	sheep	NA
Darmah_3	goat	NA
Darmah_4	beef	NA
David_village_Palmville_1	bushmeat	pangolin
David_village_Palmville_2	chicken	NA
David_village_Palmville_3	bushmeat	porcupine
David_village_Palmville_4	bushmeat	red river hog
David_village_Palmville_5	bushmeat	pangolin
Dunpea_1	goat	NA
Dunpea_2	goat	NA
Dunpea_3	chicken	NA
Dunpea_4	pig	NA
Dunpea_5	goat	NA
Duo_1	bushmeat	water chevrotain
Duo_2	beef	NA
Duo_3	bushmeat	red river hog
Duo_4	goat	NA
Dweken_1	pig	NA
Dweken_2	pig	NA
Dweken_3	chicken	NA
Dweken_4	bushmeat	duiker
Fula_camp_1	bushmeat	pangolin
Fula_camp_2	goat	NA
Fula_camp_3	chicken	NA
Fula_camp_4	beef	NA
Fula_camp_5	goat	NA
Gainkpai_1	bushmeat	crocodile
Gainkpai_2	bushmeat	red river hog
Gainkpai_3	chicken	NA
Ganwe_1	goat	NA
Ganwe_2	goat	NA
Ganwe_3	chicken	NA
Ganwe_4	goat	NA
Gbamakolieta_1	bushmeat	pangolin
Gbamakolieta_2	bushmeat	pangolin
Gbamakolieta_3	bushmeat	porcupine
Gbamakolieta_4	bushmeat	red river hog
Gbamakolieta_5	bushmeat	monkey
Gbanokansue_1	fish	NA
Gbanokansue_2	goat	NA
Gbanokansue_3	beef	NA
Gbanokansue_4	chicken/goat	NA
Gbaquah_1	chicken	NA
Gbaquah_2	beef	NA
Gbaquah_3	bushmeat	porcupine
Gbaquah_4	bushmeat	monkey
Gbaquah_5	goat	NA
Gbaquah_6	bushmeat	red river hog
Gbaye_ta_1	goat	NA
Gbaye_ta_2	beef	NA
Gbaye_ta_3	goat	NA
Gbaye_ta_4	fish	NA
Gbaye_ta_5	chicken	NA
Gbeinkay_1	bushmeat	duiker
Gbeinkay_2	bushmeat	pangolin
Gbeinkay_3	bushmeat	duiker
Gbeinkay_4	bushmeat	duiker
Gbeinkay_5	fish	NA
Gbolo_1	bushmeat	porcupine
Gbolo_2	bushmeat	red river hog
Gbolo_3	bushmeat	pangolin
Gbolo_4	bushmeat	pangolin
Geeken_1	chicken	NA
Geeken_2	bushmeat	duiker
Geipa_1	goat	NA
Geipa_2	pig	NA
Geipa_3	fish	NA
Geipa_4	chicken	NA
Geipa_5	bushmeat/cane rat	NA
Gonelor_1	beef	NA
Gonelor_2	chicken/goat/sheep	NA
Gonelor_3	goat	NA
Gonelor_4	sheep	NA
Gorbowargba_1	goat	NA
Gorbowargba_2	duck/dog	NA
Gorbowargba_3	chicken/goat	NA
Gorbowargba_4	chicken/goat	NA
Griae_1	bushmeat	pangolin
Griae_2	goat	NA
Griae_3	bushmeat/cane rat	NA
Griae_4	bushmeat/cane rat	NA
High_wood_community_1	pig	NA
High_wood_community_2	goat	NA
High_wood_community_3	pig	NA
High_wood_community_4	goat	NA
High_wood_community_5	duck	NA
Jalay_1	goat	NA
Jalay_2	beef	NA
Jalay_3	pig	NA
Jalay_4	goat	NA
Jalay_5	goat	NA
Jarkaken_1	bushmeat	porcupine
Jarkaken_2	bushmeat	water chevrotain
Jarkaken_3	bushmeat	water chevrotain
Jarkaken_4	bushmeat	red river hog
Jarkaken_5	bushmeat	pangolin
Jarmulor_Town_1	chicken	NA
Jarmulor_Town_2	goat	NA
Jarmulor_Town_3	chicken	NA
Jarmulor_Town_4	chicken/goat	NA
Juluzon_1	bushmeat	crocodile
Juluzon_2	bushmeat	red river hog
Kailahun_1	bushmeat	monkey
Kailahun_2	chicken	NA
Kailahun_3	fish	NA
Kailahun_4	bushmeat	duiker
Kailahun_5	chicken	NA
Kangba_1	bushmeat	duiker
Kilo_1	pig	NA
Kilo_2	goat	NA
Kilo_3	bushmeat	duiker
Kilo_4	pig	NA
Kings_farm_1	chicken	NA
Kings_farm_2	chicken	NA
Kings_farm_3	goat	NA
Kings_farm_4	chicken	NA
Kings_farm_5	chicken	NA
Kpellehee_1	pig	NA
Kungbor_1	goat	NA
Kungbor_2	chicken	NA
Kungbor_3	bushmeat	duiker
Kungbor_4	goat	NA
Kungbor_5	chicken	NA
Kunni_1	goat	NA
Kunni_2	bushmeat	duiker
Kunni_3	bushmeat	water chevrotain
Kunni_4	bushmeat	bushbuck
Kweaken_1	chicken	NA
Kweaken_2	bushmeat	duiker
Kweaken_3	goat	NA
Kweaken_4	bushmeat/cane rat	NA
Linezero_1	fish	NA
Linezero_2	chicken	NA
Linezero_3	fish	NA
Linezero_4	pig	NA
Linezero_5	chicken	NA
Luyeama_1	bushmeat	monkey
Luyeama_2	bushmeat/cane rat	NA
Luyeama_3	chicken	NA
Luyeama_4	goat	NA
Luyeama_5	chicken	NA
Maride_camp_1	goat	NA
Moila_1	chicken/goat	NA
Moila_2	bushmeat	pangolin
Moila_3	goat	NA
Nyannewliken_1	bushmeat	red river hog
Nyannewliken_2	chicken	NA
Nyannewliken_3	beef	NA
Nyannewliken_4	bushmeat	duiker
Nyenguita_1	fish	NA
Nyenguita_2	chicken	NA
Nyenguita_3	chicken/beef	NA
Nyenguita_4	chicken	NA
Nyforta_1	goat	NA
Nyforta_2	bushmeat	red river hog
Nyforta_3	bushmeat	water chevrotain
Nyforta_4	bushmeat	duiker
Palala_1	bushmeat	duiker
Palala_2	beef	NA
Palala_3	chicken	NA
Palala_4	chicken	NA
Qubor_1	bushmeat	porcupine
Qubor_2	beef	NA
Sayuo_Town_1	pig	NA
Sayuo_Town_2	chicken/pig	NA
Sayuo_Town_3	chicken	NA
Sayuo_Town_4	goat	NA
Sayuo_Town_5	goat	NA
Segisue_1	bushmeat	NA
Segisue_2	beef	NA
Segisue_3	chicken	NA
Segisue_4	beef	NA
Segisue_5	bushmeat	pangolin
Titiyen_1	bushmeat	turtle
Titiyen_2	beef	NA
Titiyen_3	bushmeat	red river hog
Titiyen_4	bushmeat	red river hog
Tohou_1a	bushmeat	monkey
Tohou_1b	beef	NA
Tohou_2	fish	NA
Tohou_3	goat	NA
Tojallah_Town_1	fish	NA
Tojallah_Town_2	bushmeat	duiker
Tojallah_Town_3	goat	NA
Tojallah_Town_4	chicken	NA
Troyah_1	bushmeat	pangolin
Troyah_2	chicken/goat	NA
Troyah_3	bushmeat	duiker
Troyah_4	chicken	NA
Troyah_5	goat	NA
Vemewu_1	bushmeat	duiker
Vemewu_2	bushmeat	duiker
Vemewu_3	beef	NA
Wapi_1	bushmeat	pangolin
Wapi_2	bushmeat	water chevrotain
Warkpo_1	bushmeat	duiker
Warkpo_2	bushmeat	pangolin
Warkpo_3	goat	NA
Warteken_1	beef	NA
Warteken_2	goat	NA
Warteken_3	fish	NA
Warteken_4	beef	NA
Warteken_5	goat	NA
Weamah_1	bushmeat	porcupine
Weamah_2	chicken	NA
Weamah_3	chicken	NA
Weamah_4	bushmeat	pangolin
Weamah_5	fish	NA
Welaken_1	goat	NA
Welaken_2	pig	NA
Yapa_town_1	goat	NA
Yapa_town_2	bushmeat	duiker
Yapa_town_3	bushmeat	water chevrotain
Yapa_town_4	bushmeat	water chevrotain
Yapa_town_5	chicken	NA
Zahn_town_1	chicken	NA
Zahn_town_2	chicken	NA
Zahn_town_3	chicken	NA
Zahn_town_4	goat	NA
Zahn_town_5	bushmeat/cane rat	NA
Zao_1	fish	NA
Zao_2	chicken	NA
Zao_3	pig	NA
Zawordamai_1	pig	NA
Zawordamai_2	bushmeat	red river hog
Zawordamai_3	beef	NA
Zawordamai_4	chicken	NA
Zawordamai_5	NA	NA
Ziahs_Town_1	chicken	NA
Ziahs_Town_2	goat	NA
Ziahs_Town_3	bushmeat	monkey
Ziahs_Town_4	bushmeat	duiker
Ziahs_Town_5	beef	NA
Ziahs_Town_6	bushmeat	water chevrotain
Zortapa_1	beef	NA
Zortapa_2	duck	NA

## Sheet: Meat prices.2010-2012
Bainakpale_b1	Bainakpale	before	250	NA	40	1800	NA	2800	NA	NA	NA	NA	NA	NA	NA	NA	NA	NA	NA	NA	NA	NA	NA	NA	NA	NA	NA	NA	NA	NA	NA	NA	NA	NA	NA	NA	NA	NA	NA	NA	NA	NA	NA
Bainakpale_b2	Bainakpale	before	250	NA	35	2800	3000	3000	NA	NA	NA	NA	NA	NA	NA	NA	NA	NA	NA	NA	NA	NA	NA	NA	NA	NA	NA	NA	NA	NA	NA	NA	NA	NA	NA	NA	NA	NA	NA	NA	NA	NA	NA
Bainakpale_b3	Bainakpale	before	200	NA	38	2000	3500	2500	NA	NA	NA	NA	NA	NA	NA	NA	NA	NA	NA	NA	NA	NA	NA	NA	NA	NA	NA	NA	NA	NA	NA	NA	NA	NA	NA	NA	NA	NA	NA	NA	NA	NA	NA
Bainakpale_b4	BhaiTarway	before	275	NA	150	5250	NA	NA	1800	NA	NA	NA	NA	NA	NA	NA	NA	NA	NA	NA	NA	NA	NA	NA	NA	NA	NA	NA	NA	NA	NA	NA	NA	NA	NA	NA	NA	NA	NA	NA	NA	NA	NA
Bainakpale_b5	BhaiTarway	before	250	NA	100	8750	10500	1500	1800	NA	NA	NA	NA	NA	NA	NA	NA	NA	NA	NA	NA	NA	NA	NA	NA	NA	NA	NA	NA	NA	NA	NA	NA	NA	NA	NA	NA	NA	NA	NA	NA	NA	NA
Biawu_b1	Biawu	before	350	NA	NA	4550	NA	3500	NA	NA	NA	NA	NA	NA	NA	NA	NA	NA	NA	NA	NA	NA	NA	NA	NA	NA	NA	NA	NA	NA	5000	NA	NA	NA	NA	NA	NA	NA	NA	NA	NA	NA	NA
Biawu_b2	Biawu	before	250	NA	NA	3500	NA	NA	800	NA	NA	NA	NA	NA	NA	NA	NA	NA	NA	NA	NA	NA	NA	NA	NA	NA	NA	NA	NA	NA	NA	NA	NA	NA	NA	NA	NA	NA	NA	NA	NA	NA	NA
Biawu_b3	Biawu	before	250	NA	NA	3500	5250	1000	900	NA	NA	NA	NA	NA	NA	NA	NA	NA	NA	NA	NA	NA	NA	NA	NA	NA	NA	NA	NA	NA	NA	NA	NA	NA	NA	NA	NA	NA	NA	NA	NA	NA	NA
Biawu_b4	Biawu	before	300	NA	500	4900	NA	3000	1000	NA	NA	NA	NA	NA	NA	NA	NA	NA	NA	NA	NA	NA	NA	NA	NA	NA	NA	NA	NA	NA	NA	NA	NA	NA	NA	NA	NA	NA	NA	NA	NA	NA	NA
Biawu_b5	Biawu	before	250	NA	300	3500	5000	NA	800	NA	NA	NA	NA	NA	NA	NA	NA	NA	NA	NA	NA	NA	NA	NA	NA	NA	NA	NA	NA	NA	NA	NA	NA	NA	NA	NA	NA	NA	NA	NA	NA	NA	NA
Biawu_b6	Biawu	before	150	NA	NA	3500	NA	3000	750	NA	NA	NA	NA	NA	NA	NA	NA	NA	NA	NA	NA	NA	NA	NA	NA	NA	NA	NA	NA	NA	NA	NA	NA	NA	NA	NA	NA	NA	NA	NA	NA	NA	NA
Bilitanda_b1	Bilitanda	before	350	NA	150	3500	6000	NA	1400	NA	NA	NA	NA	NA	NA	NA	NA	NA	NA	NA	NA	NA	NA	NA	NA	NA	NA	NA	NA	NA	NA	NA	NA	NA	NA	NA	NA	NA	NA	NA	NA	NA	NA
Bilitanda_b2	Bilitanda	before	250	NA	NA	5250	NA	NA	NA	NA	NA	NA	NA	NA	NA	NA	NA	NA	NA	NA	NA	NA	NA	NA	NA	NA	NA	NA	NA	NA	NA	NA	NA	NA	NA	NA	NA	NA	NA	NA	NA	NA	NA
Bilitanda_b3	Bilitanda	before	175	NA	100	4550	NA	10500	1500	NA	NA	NA	NA	NA	NA	NA	NA	NA	NA	NA	NA	NA	NA	NA	NA	NA	NA	NA	NA	NA	NA	NA	NA	NA	NA	NA	NA	NA	NA	NA	NA	NA	NA
Bilitanda_b4	Bilitanda	before	NA	NA	NA	4200	5600	2000	NA	NA	NA	NA	NA	NA	NA	NA	NA	NA	NA	NA	NA	NA	NA	NA	NA	NA	NA	NA	NA	NA	NA	NA	NA	NA	NA	NA	NA	NA	NA	NA	NA	NA	NA
Bilitanda_b5	Bilitanda	before	150	NA	160	5250	7000	1500	2000	NA	NA	NA	NA	NA	NA	NA	NA	NA	NA	NA	NA	NA	NA	NA	NA	NA	NA	NA	NA	NA	NA	NA	NA	NA	NA	NA	NA	NA	NA	NA	NA	NA	NA
CampOne_b1	CampOne	before	325	NA	100	2800	NA	4550	1500	NA	NA	NA	NA	NA	NA	NA	NA	NA	NA	NA	NA	NA	NA	NA	NA	NA	NA	NA	NA	NA	NA	NA	NA	NA	NA	NA	NA	NA	NA	NA	NA	NA	NA
CampOne_b2	CampOne	before	350	NA	50	3500	NA	NA	850	NA	NA	NA	NA	NA	NA	NA	NA	NA	NA	NA	NA	NA	NA	NA	NA	NA	NA	NA	NA	NA	NA	NA	NA	NA	NA	NA	NA	NA	NA	NA	NA	NA	NA
CampOne_b3	CampOne	before	300	NA	100	2800	NA	4900	1500	NA	NA	NA	NA	NA	NA	NA	NA	NA	NA	NA	NA	NA	NA	NA	NA	NA	NA	NA	NA	NA	NA	NA	NA	NA	NA	NA	NA	NA	NA	NA	NA	NA	NA
CampOne_b4	CampOne	before	275	NA	50	3500	NA	2800	1200	NA	NA	NA	NA	NA	NA	NA	NA	NA	NA	NA	NA	NA	NA	NA	NA	NA	NA	NA	NA	NA	NA	NA	NA	NA	NA	NA	NA	NA	NA	NA	NA	NA	NA
Chebioh_b1	Chebioh	before	200	NA	150	2450	8750	NA	750	NA	NA	NA	NA	NA	NA	NA	NA	NA	NA	NA	NA	NA	NA	NA	NA	NA	NA	NA	NA	NA	NA	NA	NA	NA	NA	NA	NA	NA	NA	NA	NA	NA	NA
Chebioh_b2	Chebioh	before	150	NA	NA	1800	2000	NA	1000	NA	NA	NA	NA	NA	NA	NA	NA	NA	NA	NA	NA	NA	NA	NA	NA	NA	NA	NA	NA	NA	NA	NA	NA	NA	NA	NA	NA	NA	NA	NA	NA	NA	NA
Chebioh_b3	Chebioh	before	200	NA	NA	2500	10500	NA	600	NA	NA	NA	NA	NA	NA	NA	NA	NA	NA	NA	NA	NA	NA	NA	NA	NA	NA	NA	NA	NA	NA	NA	NA	NA	NA	NA	NA	NA	NA	NA	NA	NA	NA
Chebioh_b4	Chebioh	before	250	NA	250	3000	5600	4375	900	NA	NA	NA	NA	NA	NA	NA	NA	NA	NA	NA	NA	NA	NA	NA	NA	NA	NA	NA	NA	NA	NA	NA	NA	NA	NA	NA	NA	NA	NA	NA	NA	NA	NA
Chebioh_b5	Chebioh	before	150	NA	80	2100	5250	NA	750	NA	NA	NA	NA	NA	NA	NA	NA	NA	NA	NA	NA	NA	NA	NA	NA	NA	NA	NA	NA	NA	NA	NA	NA	NA	NA	NA	NA	NA	NA	NA	NA	NA	NA
Dabu_b1	Dabu	before	250	NA	30	NA	NA	NA	NA	650	NA	NA	NA	NA	NA	NA	1000	1200	NA	NA	NA	NA	NA	NA	NA	NA	NA	NA	NA	NA	NA	NA	NA	NA	NA	NA	NA	NA	NA	NA	NA	NA	NA
Dabu_b2	Dabu	before	150	NA	50	NA	NA	NA	NA	700	NA	NA	NA	NA	NA	NA	NA	1500	NA	NA	NA	NA	NA	NA	NA	NA	NA	NA	NA	NA	NA	NA	NA	NA	NA	NA	NA	NA	NA	NA	NA	NA	NA
Dabu_b3	Dabu	before	150	NA	100	NA	NA	NA	NA	NA	NA	NA	NA	NA	NA	NA	NA	NA	NA	NA	NA	NA	NA	NA	NA	NA	NA	NA	NA	NA	NA	NA	NA	NA	NA	NA	NA	NA	NA	NA	NA	NA	NA
Dabu_b4	Dabu	before	150	NA	NA	NA	NA	NA	NA	NA	NA	NA	NA	NA	NA	NA	NA	NA	NA	NA	NA	NA	NA	NA	NA	NA	NA	NA	NA	NA	NA	NA	NA	NA	NA	NA	NA	NA	NA	NA	NA	NA	NA
Dabu_b5	Dabu	before	100	NA	50	NA	NA	NA	600	NA	NA	NA	NA	NA	NA	NA	NA	NA	NA	NA	NA	NA	NA	NA	NA	NA	NA	NA	NA	NA	NA	NA	NA	NA	NA	NA	NA	NA	NA	NA	NA	NA	NA
Darmah_b1	Darmah	before	350	NA	25	5600	7000	NA	NA	NA	NA	NA	NA	NA	NA	NA	NA	NA	NA	NA	NA	NA	NA	NA	NA	NA	NA	NA	NA	NA	NA	NA	NA	NA	NA	NA	NA	NA	NA	NA	NA	NA	NA
Darmah_b2	Darmah	before	350	NA	25	7000	10500	NA	600	NA	NA	NA	NA	NA	NA	NA	NA	NA	NA	NA	NA	NA	NA	NA	NA	NA	NA	NA	NA	NA	NA	NA	NA	NA	NA	NA	NA	NA	NA	NA	NA	NA	NA
Darmah_b3	Darmah	before	250	NA	30	14000	10500	NA	3000	NA	NA	NA	NA	NA	NA	NA	NA	NA	NA	NA	NA	NA	NA	NA	NA	NA	NA	NA	NA	NA	NA	NA	NA	NA	NA	NA	NA	NA	NA	NA	NA	NA	NA
Darmah_b4	Darmah	before	125	NA	100	8400	10500	NA	500	NA	NA	NA	NA	NA	NA	NA	NA	NA	NA	NA	NA	NA	NA	NA	NA	NA	NA	NA	NA	NA	NA	NA	NA	NA	NA	NA	NA	NA	NA	NA	NA	NA	NA
DavidVillagePalmville_b1	DavidVillagePalmville	before	700	NA	75	NA	NA	NA	1500	NA	NA	NA	NA	NA	NA	NA	NA	NA	NA	NA	NA	NA	NA	NA	NA	NA	NA	NA	NA	NA	NA	NA	NA	NA	NA	NA	NA	NA	NA	NA	NA	NA	NA
DavidVillagePalmville_b2	DavidVillagePalmville	before	400	NA	NA	NA	NA	NA	1500	NA	NA	NA	NA	NA	NA	NA	NA	NA	NA	NA	NA	NA	NA	NA	NA	NA	NA	NA	NA	NA	NA	NA	NA	NA	NA	NA	NA	NA	NA	NA	NA	NA	NA
DavidVillagePalmville_b3	DavidVillagePalmville	before	350	NA	60	NA	NA	NA	1500	NA	NA	NA	NA	NA	NA	NA	NA	NA	NA	NA	NA	NA	NA	NA	NA	NA	NA	NA	NA	NA	NA	NA	NA	NA	NA	NA	NA	NA	NA	NA	NA	NA	NA
DavidVillagePalmville_b4	DavidVillagePalmville	before	NA	NA	NA	NA	NA	NA	1000	NA	NA	NA	NA	NA	NA	NA	NA	NA	NA	NA	NA	NA	NA	NA	NA	NA	NA	NA	NA	NA	NA	NA	NA	NA	NA	NA	NA	NA	NA	NA	NA	NA	NA
DavidVillagePalmville_b5	DavidVillagePalmville	before	600	NA	NA	NA	NA	NA	NA	650	NA	NA	NA	NA	NA	NA	900	NA	NA	NA	NA	NA	NA	NA	NA	NA	NA	NA	NA	NA	2000	NA	NA	NA	NA	NA	NA	NA	NA	NA	NA	NA	NA
Dunpea_b1	Dunpea	before	350	NA	150	1500	2000	1500	NA	NA	NA	NA	NA	NA	NA	NA	NA	NA	NA	NA	NA	NA	NA	NA	NA	NA	NA	NA	NA	NA	NA	NA	NA	NA	NA	NA	NA	NA	NA	NA	NA	NA	NA
Dunpea_b2	Dunpea	before	150	NA	50	2500	2000	900	2000	NA	NA	NA	NA	NA	NA	NA	NA	NA	NA	NA	NA	NA	NA	NA	NA	NA	NA	NA	NA	NA	NA	NA	NA	NA	NA	NA	NA	NA	NA	NA	NA	NA	NA
Dunpea_b3	Dunpea	before	1000	NA	100	2000	NA	800	700	NA	NA	NA	NA	NA	NA	NA	NA	NA	NA	NA	NA	NA	NA	NA	NA	NA	NA	NA	NA	NA	NA	NA	NA	NA	NA	NA	NA	NA	NA	NA	NA	NA	NA
Dunpea_b4	Dunpea	before	100	NA	50	1500	2000	700	NA	NA	NA	NA	NA	NA	NA	NA	NA	NA	NA	NA	NA	NA	NA	NA	NA	NA	NA	NA	NA	NA	NA	NA	NA	NA	NA	NA	NA	NA	NA	NA	NA	NA	NA
Dunpea_b5	Dunpea	before	750	NA	30	2500	3800	1700	1000	NA	NA	NA	NA	NA	NA	NA	NA	NA	NA	NA	NA	NA	NA	NA	NA	NA	NA	NA	NA	NA	NA	NA	NA	NA	NA	NA	NA	NA	NA	NA	NA	NA	NA
Duo_b1	Duo	before	NA	NA	50	NA	NA	NA	NA	600	NA	NA	NA	NA	NA	NA	900	NA	NA	NA	300	NA	NA	NA	NA	NA	NA	NA	NA	NA	NA	NA	NA	NA	NA	NA	NA	NA	NA	NA	NA	NA	NA
Duo_b2	Duo	before	NA	NA	50	NA	NA	NA	NA	600	NA	NA	NA	NA	NA	NA	950	NA	NA	NA	350	NA	NA	NA	NA	NA	NA	NA	NA	NA	NA	NA	NA	NA	NA	NA	NA	NA	NA	NA	NA	NA	NA
Duo_b3	Duo	before	NA	NA	75	NA	NA	NA	NA	550	NA	NA	NA	NA	NA	NA	925	NA	NA	NA	400	NA	NA	NA	NA	NA	NA	NA	NA	NA	NA	NA	NA	NA	NA	NA	NA	NA	NA	NA	NA	NA	NA
Duo_b4	Duo	before	NA	NA	75	NA	NA	NA	NA	500	NA	NA	NA	NA	NA	NA	NA	950	NA	NA	375	NA	NA	NA	NA	NA	NA	NA	NA	NA	NA	NA	NA	NA	NA	NA	NA	NA	NA	NA	NA	NA	NA
FullahCamp_b1	FullahCamp	before	300	NA	100	NA	NA	NA	1400	NA	NA	NA	NA	NA	NA	NA	NA	NA	NA	NA	NA	NA	NA	NA	NA	NA	NA	NA	NA	NA	NA	NA	NA	NA	NA	NA	NA	NA	NA	NA	NA	NA	NA
FullahCamp_b2	FullahCamp	before	350	NA	50	NA	8500	NA	NA	NA	NA	NA	NA	NA	NA	NA	NA	NA	NA	NA	1000	NA	NA	NA	NA	NA	NA	NA	NA	NA	NA	NA	NA	NA	NA	NA	NA	NA	NA	NA	NA	NA	NA
FullahCamp_b3	FullahCamp	before	NA	NA	NA	NA	NA	NA	NA	NA	NA	NA	NA	NA	NA	NA	NA	NA	NA	NA	NA	NA	NA	NA	NA	NA	NA	NA	NA	NA	NA	NA	NA	NA	NA	NA	NA	NA	NA	NA	NA	NA	NA
FullahCamp_b4	FullahCamp	before	375	NA	NA	NA	NA	NA	NA	NA	NA	NA	NA	NA	NA	NA	NA	NA	NA	NA	800	NA	NA	NA	NA	NA	NA	NA	NA	NA	NA	NA	NA	NA	NA	NA	NA	NA	NA	NA	NA	NA	NA
FullahCamp_b5	FullahCamp	before	350	NA	83	NA	9000	10000	NA	NA	NA	NA	NA	NA	NA	NA	NA	NA	NA	NA	NA	NA	NA	NA	NA	NA	NA	NA	NA	NA	NA	NA	NA	NA	NA	NA	NA	NA	NA	NA	NA	NA	NA
Gainkpai_MarriedCamp_b1	Gainkpai_MarriedCamp	before	175	NA	NA	NA	10500	NA	NA	NA	NA	NA	NA	NA	NA	NA	2000	NA	NA	NA	1500	NA	NA	NA	NA	NA	NA	NA	NA	NA	NA	NA	NA	1000	NA	NA	NA	NA	NA	NA	NA	NA	NA
Gainkpai_MarriedCamp_b2	Gainkpai_MarriedCamp	before	350	NA	350	NA	NA	NA	1000	NA	NA	NA	NA	NA	NA	NA	NA	NA	NA	NA	NA	NA	NA	NA	NA	NA	NA	NA	NA	NA	NA	NA	NA	NA	NA	NA	NA	NA	NA	NA	NA	NA	NA
Gainkpai_MarriedCamp_b3	Gainkpai_MarriedCamp	before	400	NA	75	NA	10500	NA	1000	NA	NA	NA	NA	NA	NA	NA	NA	NA	NA	NA	NA	NA	NA	NA	NA	NA	NA	NA	NA	NA	NA	NA	NA	NA	NA	NA	NA	NA	NA	NA	NA	NA	NA
Ganwe_b1	Ganwe	before	450	NA	50	3500	4500	3500	1200	NA	NA	NA	NA	NA	NA	NA	NA	NA	NA	NA	NA	NA	NA	NA	NA	NA	NA	NA	NA	NA	NA	NA	NA	NA	NA	NA	NA	NA	NA	NA	NA	NA	NA
Ganwe_b2	Ganwe	before	400	NA	50	2500	3000	2800	NA	NA	NA	NA	NA	NA	NA	NA	NA	NA	NA	NA	NA	NA	NA	NA	NA	NA	NA	NA	NA	NA	NA	NA	NA	NA	NA	NA	NA	NA	NA	NA	NA	NA	NA
Ganwe_b3	Ganwe	before	350	56000	60	3000	4000	4000	NA	900	NA	NA	NA	NA	NA	NA	NA	NA	NA	NA	NA	NA	NA	NA	NA	NA	NA	NA	NA	NA	NA	NA	NA	NA	NA	NA	NA	NA	NA	NA	NA	NA	NA
Ganwe_b4	Ganwe	before	300	NA	60	3500	4500	4000	850	NA	NA	NA	NA	NA	NA	NA	NA	NA	NA	NA	NA	NA	NA	NA	NA	NA	NA	NA	NA	NA	NA	NA	NA	NA	NA	NA	NA	NA	NA	NA	NA	NA	NA
Gbamakolieta_b1	Gbamakolieta	before	275	NA	50	NA	NA	2500	4000	NA	NA	NA	NA	NA	NA	NA	NA	NA	NA	NA	NA	NA	NA	NA	NA	NA	NA	NA	NA	NA	NA	NA	NA	NA	NA	NA	NA	NA	NA	NA	NA	NA	NA
Gbamakolieta_b2	Gbamakolieta	before	250	NA	NA	NA	NA	2500	4000	NA	NA	NA	NA	NA	NA	NA	NA	NA	NA	NA	NA	NA	NA	NA	NA	NA	NA	NA	NA	NA	NA	NA	NA	NA	NA	NA	NA	NA	NA	NA	NA	NA	NA
Gbamakolieta_b3	Gbamakolieta	before	275	NA	75	NA	NA	2500	4000	NA	NA	NA	NA	NA	NA	NA	NA	NA	NA	NA	NA	NA	NA	NA	NA	NA	NA	NA	NA	NA	NA	NA	NA	NA	NA	NA	NA	NA	NA	NA	NA	NA	NA
Gbamakolieta_b4	Gbamakolieta	before	350	NA	30	NA	NA	3500	NA	1200	NA	NA	NA	NA	NA	NA	NA	NA	NA	NA	NA	NA	NA	NA	NA	NA	NA	NA	NA	NA	NA	NA	NA	NA	NA	NA	NA	NA	NA	NA	NA	NA	NA
Gbamakolieta_b5	Gbamakolieta	before	300	NA	30	NA	NA	3000	NA	1200	NA	NA	NA	NA	NA	NA	NA	NA	NA	NA	NA	NA	NA	NA	NA	NA	NA	NA	NA	NA	NA	NA	NA	NA	NA	NA	NA	NA	NA	NA	NA	NA	NA
Gbanokansue_b1	Gbanokansue	before	350	NA	50	NA	NA	NA	NA	NA	NA	NA	NA	NA	NA	NA	NA	NA	NA	NA	NA	NA	NA	NA	NA	NA	NA	NA	NA	NA	NA	NA	NA	NA	NA	NA	NA	NA	NA	NA	NA	NA	NA
Gbanokansue_b2	Gbanokansue	before	150	NA	45	6300	NA	3500	400	NA	NA	NA	NA	NA	NA	NA	NA	NA	NA	NA	NA	NA	NA	NA	NA	NA	NA	NA	NA	NA	NA	NA	NA	NA	NA	NA	NA	NA	NA	NA	NA	NA	NA
Gbanokansue_b3	Gbanokansue	before	250	NA	40	3500	5250	3000	1000	NA	NA	NA	NA	NA	NA	NA	NA	NA	NA	NA	NA	NA	NA	NA	NA	NA	NA	NA	NA	NA	NA	NA	NA	NA	NA	NA	NA	NA	NA	NA	NA	NA	NA
Gbanokansue_b4	Gbanokansue	before	350	NA	100	NA	NA	NA	2000	NA	NA	NA	NA	NA	NA	NA	NA	NA	NA	NA	NA	NA	NA	NA	NA	NA	NA	NA	NA	NA	NA	NA	NA	NA	NA	NA	NA	NA	NA	NA	NA	NA	NA
Gbaquah_b1	Gbaquah	before	150	NA	75	2500	3500	NA	NA	375	NA	NA	NA	NA	NA	NA	900	1300	NA	NA	NA	NA	NA	NA	NA	NA	NA	NA	NA	NA	NA	NA	NA	NA	NA	NA	NA	NA	NA	NA	NA	NA	NA
Gbaquah_b2	Gbaquah	before	150	NA	25	2000	3500	NA	1000	NA	NA	NA	NA	NA	NA	NA	NA	NA	NA	NA	NA	NA	NA	NA	NA	NA	NA	NA	NA	NA	NA	NA	NA	NA	NA	NA	NA	NA	NA	NA	NA	NA	NA
Gbaquah_b3	Gbaquah	before	150	NA	20	1800	2000	NA	1000	NA	NA	NA	NA	NA	NA	NA	NA	NA	NA	NA	NA	NA	NA	NA	NA	NA	NA	NA	NA	NA	NA	NA	NA	NA	NA	NA	NA	NA	NA	NA	NA	NA	NA
Gbaquah_b4	Gbaquah	before	200	NA	100	2000	NA	NA	400	NA	NA	NA	NA	NA	NA	NA	NA	NA	NA	NA	NA	NA	NA	NA	NA	NA	NA	NA	NA	NA	NA	NA	NA	NA	NA	NA	NA	NA	NA	NA	NA	NA	NA
Gbaquah_b5	Gbaquah	before	100	NA	100	1000	1200	NA	1200	NA	NA	NA	NA	NA	NA	NA	NA	NA	NA	NA	NA	NA	NA	NA	NA	NA	NA	NA	NA	NA	NA	NA	NA	NA	NA	NA	NA	NA	NA	NA	NA	NA	NA
Gbaquah_b6	Gbaquah	before	200	NA	100	1500	3000	NA	NA	NA	NA	NA	NA	NA	NA	NA	NA	NA	NA	NA	NA	NA	NA	NA	NA	NA	NA	NA	NA	NA	1000	NA	NA	NA	NA	NA	NA	NA	NA	NA	NA	NA	NA
GbayeTa_b1	GbayeTa	before	275	NA	40	3500	4200	NA	NA	NA	NA	NA	NA	NA	NA	NA	NA	NA	NA	NA	NA	NA	NA	NA	NA	NA	NA	NA	NA	NA	NA	NA	NA	NA	NA	NA	NA	NA	NA	NA	NA	NA	NA
GbayeTa_b2	GbayeTa	before	200	96250	40	3500	10500	5000	600	NA	NA	NA	NA	NA	NA	NA	NA	NA	NA	NA	NA	NA	NA	NA	NA	NA	NA	NA	NA	NA	NA	NA	NA	NA	NA	NA	NA	NA	NA	NA	NA	NA	NA
GbayeTa_b3	GbayeTa	before	350	NA	200	3150	4200	6300	1000	NA	NA	NA	NA	NA	NA	NA	NA	NA	NA	NA	NA	NA	NA	NA	NA	NA	NA	NA	NA	NA	NA	NA	NA	NA	NA	NA	NA	NA	NA	NA	NA	NA	NA
GbayeTa_b4	GbayeTa	before	350	NA	40	NA	NA	NA	NA	NA	NA	NA	NA	NA	NA	NA	NA	NA	NA	NA	NA	NA	NA	NA	NA	NA	NA	NA	NA	NA	NA	NA	NA	NA	NA	NA	NA	NA	NA	NA	NA	NA	NA
GbayeTa_b5	GbayeTa	before	350	NA	250	NA	NA	NA	1000	NA	NA	NA	NA	NA	NA	NA	NA	NA	NA	NA	NA	NA	NA	NA	NA	NA	NA	NA	NA	NA	NA	NA	NA	NA	NA	NA	NA	NA	NA	NA	NA	NA	NA
Gbolo_b1	Gbolo	before	300	NA	50	NA	NA	NA	NA	800	NA	NA	NA	NA	NA	NA	3250	NA	NA	NA	NA	NA	NA	NA	NA	NA	NA	NA	NA	NA	NA	NA	NA	NA	NA	NA	NA	NA	NA	NA	NA	NA	NA
Gbolo_b2	Gbolo	before	325	NA	NA	NA	NA	NA	NA	900	NA	NA	NA	NA	NA	NA	NA	NA	NA	NA	NA	NA	NA	NA	NA	NA	NA	NA	NA	NA	NA	NA	NA	NA	NA	NA	NA	NA	NA	NA	NA	NA	NA
Gbolo_b3	Gbolo	before	300	NA	50	NA	NA	NA	NA	800	NA	NA	NA	NA	NA	NA	3000	NA	NA	NA	NA	NA	NA	NA	NA	NA	NA	NA	NA	NA	NA	NA	NA	NA	NA	NA	NA	NA	NA	NA	NA	NA	NA
Gbolo_b4	Gbolo	before	350	NA	50	NA	NA	NA	NA	850	NA	NA	NA	NA	NA	NA	NA	NA	NA	NA	NA	NA	NA	NA	NA	NA	NA	NA	NA	NA	NA	NA	NA	NA	NA	NA	NA	NA	NA	NA	NA	NA	NA
Geeken_b1	Geeken	before	150	NA	150	2800	3500	400	2500	NA	NA	NA	NA	NA	NA	NA	NA	NA	NA	NA	NA	NA	NA	NA	NA	NA	NA	NA	NA	NA	NA	NA	NA	NA	NA	NA	NA	NA	NA	NA	NA	NA	NA
Geeken_b2	Geeken	before	200	NA	100	3450	4200	3000	3000	NA	NA	NA	NA	NA	NA	NA	NA	NA	NA	NA	NA	NA	NA	NA	NA	NA	NA	NA	NA	NA	NA	NA	NA	NA	NA	NA	NA	NA	NA	NA	NA	NA	NA
Geipa_b1	Geipa	before	300	NA	NA	3000	7000	4000	1500	NA	NA	NA	NA	NA	NA	NA	NA	NA	NA	NA	NA	NA	NA	NA	NA	NA	NA	NA	NA	NA	NA	NA	NA	NA	NA	NA	NA	NA	NA	NA	NA	NA	NA
Geipa_b2	Geipa	before	250	NA	NA	3500	6000	25000	500	NA	NA	NA	NA	NA	NA	NA	NA	NA	NA	NA	NA	NA	NA	NA	NA	NA	NA	NA	NA	NA	NA	NA	NA	NA	NA	NA	NA	NA	NA	NA	NA	NA	NA
Geipa_b3	Geipa	before	250	NA	150	2000	1500	1000	1400	NA	NA	NA	NA	NA	NA	NA	NA	NA	NA	NA	NA	NA	NA	NA	NA	NA	NA	NA	NA	NA	NA	NA	NA	NA	NA	NA	NA	NA	NA	NA	NA	NA	NA
Geipa_b4	Geipa	before	300	NA	500	3000	8000	5000	1600	NA	NA	NA	NA	NA	NA	NA	NA	NA	NA	NA	NA	NA	NA	NA	NA	NA	NA	NA	NA	NA	NA	NA	NA	NA	NA	NA	NA	NA	NA	NA	NA	NA	NA
Geipa_b5	Geipa	before	250	NA	30	3000	4000	2000	NA	1400	NA	NA	NA	NA	NA	NA	NA	NA	NA	NA	NA	NA	NA	NA	NA	NA	NA	NA	NA	NA	NA	NA	NA	NA	NA	NA	NA	NA	NA	NA	NA	NA	NA
Gonelor_b1	Gonelor	before	200	68750	25	8750	10500	NA	NA	NA	NA	NA	NA	NA	NA	NA	NA	NA	NA	NA	NA	NA	NA	NA	NA	NA	NA	NA	NA	NA	NA	NA	NA	NA	NA	NA	NA	NA	NA	NA	NA	NA	NA
Gonelor_b2	Gonelor	before	200	NA	25	8400	8400	NA	NA	NA	NA	NA	NA	NA	NA	NA	NA	NA	NA	NA	NA	NA	NA	NA	NA	NA	NA	NA	NA	NA	NA	NA	NA	NA	NA	NA	NA	NA	NA	NA	NA	NA	NA
Gonelor_b3	Gonelor	before	200	NA	50	2000	5250	2500	NA	NA	NA	NA	NA	NA	NA	NA	NA	NA	NA	NA	NA	NA	NA	NA	NA	NA	NA	NA	NA	NA	NA	2000	NA	NA	NA	NA	NA	NA	NA	NA	NA	NA	NA
Gonelor_b4	Gonelor	before	125	NA	10	2800	3500	5000	1500	NA	NA	NA	NA	NA	NA	NA	NA	NA	NA	NA	NA	NA	NA	NA	NA	NA	NA	NA	NA	NA	NA	NA	NA	NA	NA	NA	NA	NA	NA	NA	NA	NA	NA
Gorbowargba_b1	Gorbowargba	before	250	NA	200	2500	NA	NA	1000	NA	NA	NA	NA	NA	NA	NA	NA	NA	NA	NA	NA	NA	NA	NA	NA	NA	NA	NA	NA	NA	NA	NA	NA	NA	NA	NA	NA	NA	NA	NA	NA	NA	NA
Gorbowargba_b2	Gorbowargba	before	150	NA	250	2500	NA	NA	NA	NA	NA	NA	NA	NA	NA	NA	NA	1300	NA	NA	NA	NA	NA	NA	NA	NA	NA	NA	NA	NA	NA	NA	NA	NA	NA	NA	NA	NA	NA	NA	NA	NA	NA
Gorbowargba_b3	Gorbowargba	before	150	NA	25	3500	NA	NA	1500	NA	NA	NA	NA	NA	NA	NA	NA	NA	NA	NA	NA	NA	NA	NA	NA	NA	NA	NA	NA	NA	NA	NA	NA	NA	NA	NA	NA	NA	NA	NA	NA	NA	NA
Gorbowargba_b4	Gorbowargba	before	350	NA	450	3500	10500	NA	1500	NA	NA	NA	NA	NA	NA	NA	NA	NA	NA	NA	NA	NA	NA	NA	NA	NA	NA	NA	NA	NA	NA	NA	NA	NA	NA	NA	NA	NA	NA	NA	NA	NA	NA
Griae_b1	Griae	before	450	NA	100	3000	7000	5000	NA	NA	NA	NA	NA	NA	NA	NA	NA	NA	NA	NA	NA	NA	NA	NA	NA	NA	NA	NA	NA	NA	NA	NA	NA	NA	NA	NA	NA	NA	NA	NA	NA	NA	NA
Griae_b2	Griae	before	400	NA	40	2000	5000	3000	NA	NA	NA	NA	NA	NA	NA	NA	NA	NA	NA	NA	NA	NA	NA	NA	NA	NA	NA	NA	NA	NA	NA	NA	NA	NA	NA	NA	NA	NA	NA	NA	NA	NA	NA
Griae_b3	Griae	before	50	NA	NA	3000	6500	2500	NA	NA	NA	NA	NA	NA	NA	NA	NA	NA	NA	NA	NA	NA	NA	NA	NA	NA	NA	NA	NA	NA	NA	NA	NA	NA	NA	NA	NA	NA	NA	NA	NA	NA	NA
Griae_b4	Griae	before	500	NA	50	3500	5000	3000	NA	NA	NA	NA	NA	NA	NA	NA	NA	NA	NA	NA	NA	NA	NA	NA	NA	NA	NA	NA	NA	NA	NA	NA	NA	NA	NA	NA	NA	NA	NA	NA	NA	NA	NA
HighwoodCommunity_b1	HighwoodCommunity	before	350	NA	NA	2500	6000	3000	NA	NA	NA	NA	NA	NA	NA	NA	NA	NA	NA	NA	NA	NA	NA	NA	NA	NA	NA	NA	NA	NA	NA	NA	NA	NA	NA	NA	NA	NA	NA	NA	NA	NA	NA
HighwoodCommunity_b2	HighwoodCommunity	before	300	NA	25	2500	6500	3000	NA	1200	NA	NA	NA	NA	NA	NA	NA	NA	NA	NA	NA	NA	NA	NA	NA	NA	NA	NA	NA	NA	NA	NA	NA	NA	NA	NA	NA	NA	NA	NA	NA	NA	NA
HighwoodCommunity_b3	HighwoodCommunity	before	350	NA	25	2500	4000	3000	NA	NA	NA	NA	NA	NA	NA	NA	NA	2800	NA	NA	NA	NA	NA	NA	NA	NA	NA	NA	NA	NA	NA	NA	NA	NA	NA	NA	NA	NA	NA	NA	NA	NA	NA
HighwoodCommunity_b4	HighwoodCommunity	before	300	NA	25	2500	6500	3000	2600	NA	NA	NA	NA	NA	NA	NA	NA	NA	NA	NA	NA	NA	NA	NA	NA	NA	NA	NA	NA	NA	NA	NA	NA	NA	NA	NA	NA	NA	NA	NA	NA	NA	NA
HighwoodCommunity_b5	HighwoodCommunity	before	350	NA	25	2000	3000	3500	NA	2000	NA	NA	NA	NA	NA	NA	NA	NA	NA	NA	NA	NA	NA	NA	NA	NA	NA	NA	NA	NA	NA	NA	NA	NA	NA	NA	NA	NA	NA	NA	NA	NA	NA
Jalay_b1	Jalay	before	300	NA	150	2000	3500	NA	1400	NA	NA	NA	NA	NA	NA	NA	NA	NA	NA	NA	NA	NA	NA	NA	NA	NA	NA	NA	NA	NA	NA	NA	NA	NA	NA	NA	NA	NA	NA	NA	NA	NA	NA
Jalay_b2	Jalay	before	250	NA	33	2500	10000	NA	NA	NA	NA	NA	NA	NA	NA	NA	NA	NA	NA	NA	NA	NA	NA	NA	NA	NA	NA	NA	NA	NA	NA	NA	NA	NA	NA	NA	NA	NA	NA	NA	NA	NA	NA
Jalay_b3	Jalay	before	250	NA	275	2500	6000	NA	900	NA	NA	NA	NA	NA	NA	NA	NA	NA	NA	NA	NA	NA	NA	NA	NA	NA	NA	NA	NA	NA	NA	NA	NA	NA	NA	NA	NA	NA	NA	NA	NA	NA	NA
Jalay_b4	Jalay	before	350	NA	200	7000	10000	NA	400	NA	NA	NA	NA	NA	NA	NA	NA	NA	NA	NA	NA	NA	NA	NA	NA	NA	NA	NA	NA	NA	NA	NA	NA	NA	NA	NA	NA	NA	NA	NA	NA	NA	NA
Jalay_b5	Jalay	before	250	NA	250	2500	10000	NA	1500	NA	NA	NA	NA	NA	NA	NA	NA	NA	NA	NA	NA	NA	NA	NA	NA	NA	NA	NA	NA	NA	NA	NA	NA	NA	NA	NA	NA	NA	NA	NA	NA	NA	NA
Jarkaken_b1	Jarkaken	before	275	NA	17	3500	4500	NA	1500	NA	NA	NA	NA	NA	NA	NA	NA	NA	NA	NA	NA	NA	NA	NA	NA	NA	NA	NA	NA	NA	NA	NA	NA	NA	NA	NA	NA	NA	NA	NA	NA	NA	NA
Jarkaken_b2	Jarkaken	before	300	NA	17	3500	5000	NA	1500	NA	NA	NA	NA	NA	NA	NA	NA	NA	NA	NA	NA	NA	NA	NA	NA	NA	NA	NA	NA	NA	NA	NA	NA	NA	NA	NA	NA	NA	NA	NA	NA	NA	NA
Jarkaken_b3	Jarkaken	before	300	NA	17	3500	5000	NA	1500	NA	NA	NA	NA	NA	NA	NA	NA	NA	NA	NA	NA	NA	NA	NA	NA	NA	NA	NA	NA	NA	NA	NA	NA	NA	NA	NA	NA	NA	NA	NA	NA	NA	NA
Jarkaken_b4	Jarkaken	before	175	NA	17	3500	4500	NA	1500	NA	NA	NA	NA	NA	NA	NA	NA	NA	NA	NA	NA	NA	NA	NA	NA	NA	NA	NA	NA	NA	NA	NA	NA	NA	NA	NA	NA	NA	NA	NA	NA	NA	NA
Jarkaken_b5	Jarkaken	before	300	NA	17	3500	4500	NA	1500	NA	NA	NA	NA	NA	NA	NA	NA	NA	NA	NA	NA	NA	NA	NA	NA	NA	NA	NA	NA	NA	NA	NA	NA	NA	NA	NA	NA	NA	NA	NA	NA	NA	NA
Jarmulor_b1	Jarmulor	before	130	NA	200	NA	2500	NA	600	NA	NA	NA	NA	NA	NA	NA	NA	NA	NA	NA	NA	NA	NA	NA	NA	NA	NA	NA	NA	NA	NA	NA	NA	NA	NA	NA	NA	NA	NA	NA	NA	NA	NA
Jarmulor_b2	Jarmulor	before	200	24500	250	2500	4500	NA	600	NA	NA	NA	NA	NA	NA	NA	NA	NA	NA	NA	NA	NA	NA	NA	NA	NA	NA	NA	NA	NA	NA	NA	NA	NA	NA	NA	NA	NA	NA	NA	NA	NA	NA
Jarmulor_b3	Jarmulor	before	250	24500	200	1500	NA	NA	700	NA	NA	NA	NA	NA	NA	NA	NA	NA	NA	NA	NA	NA	NA	NA	NA	NA	NA	NA	NA	NA	NA	NA	NA	NA	NA	NA	NA	NA	NA	NA	NA	NA	NA
Jarmulor_b4	Jarmulor	before	150	NA	50	1500	3000	NA	400	NA	NA	NA	NA	NA	NA	NA	NA	NA	NA	NA	NA	NA	NA	NA	NA	NA	NA	NA	NA	NA	NA	NA	NA	NA	NA	NA	NA	NA	NA	NA	NA	NA	NA
Juluzon_b1	Juluzon	before	250	NA	150	NA	NA	NA	1500	NA	NA	NA	NA	NA	NA	NA	NA	NA	NA	NA	NA	NA	NA	NA	NA	NA	NA	NA	NA	NA	NA	NA	NA	NA	NA	NA	NA	NA	NA	NA	NA	NA	NA
Juluzon_b2	Juluzon	before	250	NA	50	NA	NA	NA	1500	NA	NA	NA	NA	NA	NA	NA	NA	NA	NA	NA	NA	NA	NA	NA	NA	NA	NA	NA	NA	NA	NA	NA	NA	NA	NA	NA	NA	NA	NA	NA	NA	NA	NA
Kailahun_b1	Kailahun	before	100	NA	150	2500	6000	NA	1700	NA	NA	NA	NA	NA	NA	NA	NA	NA	NA	NA	NA	NA	NA	NA	NA	NA	NA	NA	NA	NA	NA	NA	NA	NA	NA	NA	NA	NA	NA	NA	NA	NA	NA
Kailahun_b2	Kailahun	before	150	NA	20	5000	6000	NA	1600	NA	NA	NA	NA	NA	NA	NA	NA	NA	NA	NA	NA	NA	NA	NA	NA	NA	NA	NA	NA	NA	NA	NA	NA	NA	NA	NA	NA	NA	NA	NA	NA	NA	NA
Kailahun_b3	Kailahun	before	200	NA	200	500	7000	NA	600	NA	NA	NA	NA	NA	NA	NA	NA	NA	NA	NA	NA	NA	NA	NA	NA	NA	NA	NA	NA	NA	NA	NA	NA	NA	NA	NA	NA	NA	NA	NA	NA	NA	NA
Kailahun_b4	Kailahun	before	150	NA	200	4000	5000	NA	NA	NA	NA	NA	NA	NA	NA	NA	NA	NA	NA	NA	NA	NA	NA	NA	NA	NA	NA	NA	NA	NA	7000	NA	NA	NA	NA	NA	NA	NA	NA	NA	NA	NA	NA
Kailahun_b5	Kailahun	before	150	NA	50	2000	7000	NA	NA	NA	NA	NA	NA	NA	NA	NA	NA	NA	NA	NA	NA	NA	NA	NA	NA	NA	NA	NA	NA	NA	NA	NA	NA	NA	NA	NA	NA	NA	NA	NA	NA	NA	NA
Kilo_b1	Kilo	before	250	NA	25	3000	NA	3500	NA	NA	NA	NA	NA	NA	NA	NA	NA	NA	NA	NA	NA	NA	NA	NA	NA	NA	NA	NA	NA	NA	NA	NA	NA	NA	NA	NA	NA	NA	NA	NA	NA	NA	NA
Kilo_b2	Kilo	before	250	NA	25	3500	NA	2475	NA	NA	300	NA	NA	NA	NA	NA	NA	NA	NA	NA	NA	NA	NA	NA	NA	NA	NA	NA	NA	NA	NA	NA	NA	NA	NA	NA	NA	NA	NA	NA	NA	NA	NA
Kilo_b3	Kilo	before	300	NA	50	2800	NA	3500	NA	NA	NA	NA	NA	NA	NA	NA	NA	975	NA	NA	NA	NA	NA	NA	NA	NA	NA	NA	NA	NA	NA	NA	NA	NA	NA	NA	NA	NA	NA	NA	NA	NA	NA
Kilo_b4	Kilo	before	250	NA	50	3000	NA	2475	NA	NA	NA	800	NA	NA	NA	NA	NA	NA	NA	NA	NA	NA	NA	NA	NA	NA	NA	NA	NA	NA	NA	NA	NA	NA	NA	NA	NA	NA	NA	NA	NA	NA	NA
KingsFarm_b1	KingsFarm	before	200	NA	NA	4900	NA	NA	NA	NA	NA	NA	NA	NA	NA	NA	NA	NA	NA	NA	NA	NA	NA	NA	NA	NA	NA	NA	NA	NA	NA	NA	NA	NA	NA	NA	NA	NA	NA	NA	NA	NA	NA
KingsFarm_b2	KingsFarm	before	150	NA	NA	4200	NA	NA	NA	NA	NA	NA	NA	NA	NA	NA	NA	NA	NA	NA	NA	NA	NA	NA	NA	NA	NA	NA	NA	NA	NA	NA	NA	NA	NA	NA	NA	NA	NA	NA	NA	NA	NA
KingsFarm_b3	KingsFarm	before	200	NA	NA	3500	NA	NA	NA	NA	NA	NA	NA	NA	500	NA	NA	NA	NA	NA	NA	NA	NA	NA	NA	NA	NA	NA	NA	NA	NA	NA	NA	NA	NA	NA	NA	NA	NA	NA	NA	NA	NA
KingsFarm_b4	KingsFarm	before	300	NA	NA	NA	NA	52500	NA	NA	NA	NA	NA	NA	NA	NA	NA	NA	NA	NA	NA	NA	NA	NA	NA	NA	NA	NA	NA	NA	NA	NA	NA	NA	NA	NA	NA	NA	NA	NA	NA	NA	NA
KingsFarm_b5	KingsFarm	before	350	NA	NA	NA	NA	3500	NA	NA	NA	NA	NA	NA	NA	NA	NA	NA	NA	NA	NA	NA	NA	NA	NA	NA	NA	NA	NA	NA	NA	NA	NA	NA	NA	NA	NA	NA	NA	NA	NA	NA	NA
Kpellehee_b1	Kpellehee	before	700	NA	150	2500	NA	3000	750	NA	NA	NA	NA	NA	NA	NA	NA	NA	NA	NA	NA	NA	NA	NA	NA	NA	NA	NA	NA	NA	NA	NA	NA	NA	NA	NA	NA	NA	NA	NA	NA	NA	NA
Kungbor_b1	Kungbor	before	300	NA	25	NA	NA	NA	500	NA	NA	NA	NA	NA	NA	NA	NA	NA	NA	NA	NA	NA	NA	NA	NA	NA	NA	NA	NA	NA	NA	NA	NA	NA	NA	NA	NA	NA	NA	NA	NA	NA	NA
Kungbor_b2	Kungbor	before	250	NA	NA	NA	NA	NA	500	NA	NA	NA	NA	NA	NA	NA	NA	NA	NA	NA	NA	NA	NA	NA	NA	NA	NA	NA	NA	NA	NA	NA	NA	NA	NA	NA	NA	NA	NA	NA	NA	NA	NA
Kungbor_b3	Kungbor	before	250	NA	50	1000	1500	NA	600	NA	NA	NA	NA	NA	NA	NA	NA	NA	NA	NA	NA	NA	NA	NA	NA	NA	NA	NA	NA	NA	NA	NA	NA	NA	NA	NA	NA	NA	NA	NA	NA	NA	NA
Kungbor_b4	Kungbor	before	200	NA	150	7000	1400	NA	500	NA	NA	NA	NA	NA	NA	NA	NA	NA	NA	NA	NA	NA	NA	NA	NA	NA	NA	NA	NA	NA	NA	NA	NA	NA	NA	NA	NA	NA	NA	NA	NA	NA	NA
Kungbor_b5	Kungbor	before	450	NA	NA	NA	NA	NA	800	NA	NA	NA	NA	NA	NA	NA	NA	NA	NA	NA	NA	NA	NA	NA	NA	NA	NA	NA	NA	NA	NA	NA	NA	NA	NA	NA	NA	NA	NA	NA	NA	NA	NA
Kunni_b1	Kunni	before	275	NA	50	3000	6000	NA	NA	NA	NA	NA	NA	NA	NA	NA	NA	NA	NA	NA	NA	NA	NA	NA	NA	NA	NA	NA	NA	NA	NA	NA	NA	NA	NA	NA	NA	NA	NA	NA	NA	NA	NA
Kunni_b2	Kunni	before	300	NA	33	3000	5000	NA	NA	NA	NA	NA	NA	NA	NA	NA	NA	NA	NA	NA	NA	NA	NA	NA	NA	NA	NA	NA	NA	NA	NA	NA	NA	NA	NA	NA	NA	NA	NA	NA	NA	NA	NA
Kunni_b3	Kunni	before	250	NA	33	3000	5000	NA	NA	NA	NA	NA	NA	NA	NA	NA	NA	NA	NA	NA	NA	NA	NA	NA	NA	NA	NA	NA	NA	NA	NA	NA	NA	NA	NA	NA	NA	NA	NA	NA	NA	NA	NA
Kunni_b4	Kunni	before	300	NA	33	3000	5500	NA	NA	NA	NA	NA	NA	NA	NA	NA	NA	NA	NA	NA	NA	NA	NA	NA	NA	NA	NA	NA	NA	NA	NA	NA	NA	NA	NA	NA	NA	NA	NA	NA	NA	NA	NA
Kweaken_b1	Kweaken	before	150	NA	100	3150	3500	3500	NA	NA	NA	NA	NA	NA	NA	NA	NA	NA	NA	NA	NA	NA	NA	NA	NA	NA	NA	NA	NA	NA	NA	NA	NA	NA	NA	NA	NA	NA	NA	NA	NA	NA	NA
Kweaken_b2	Kweaken	before	150	NA	100	2800	3500	3500	NA	NA	NA	NA	NA	NA	NA	NA	NA	NA	NA	NA	NA	NA	NA	NA	NA	NA	NA	NA	NA	NA	NA	NA	NA	NA	NA	NA	NA	NA	NA	NA	NA	NA	NA
Kweaken_b3	Kweaken	before	150	NA	100	2800	4200	3000	2500	NA	NA	NA	NA	NA	NA	NA	NA	NA	NA	NA	NA	NA	NA	NA	NA	NA	NA	NA	NA	NA	NA	NA	NA	NA	NA	NA	NA	NA	NA	NA	NA	NA	NA
Kweaken_b4	Kweaken	before	150	NA	100	3500	5250	2650	NA	NA	NA	NA	NA	NA	NA	NA	NA	NA	NA	NA	NA	NA	NA	NA	NA	NA	NA	NA	NA	NA	NA	NA	NA	NA	NA	NA	NA	NA	NA	NA	NA	NA	NA
LineZero_b1	LineZero	before	350	NA	NA	NA	NA	NA	NA	NA	NA	NA	NA	NA	NA	NA	1500	NA	NA	NA	NA	NA	NA	NA	NA	NA	NA	NA	NA	NA	NA	NA	NA	NA	NA	NA	NA	NA	NA	NA	NA	NA	NA
LineZero_b2	LineZero	before	150	NA	50	NA	NA	NA	NA	500	NA	NA	NA	NA	NA	NA	NA	NA	NA	NA	NA	NA	NA	NA	NA	NA	NA	NA	NA	NA	NA	NA	NA	NA	NA	NA	NA	NA	NA	NA	NA	NA	NA
LineZero_b3	LineZero	before	400	NA	50	NA	NA	NA	800	NA	NA	NA	NA	NA	NA	NA	NA	NA	NA	NA	NA	NA	NA	NA	NA	NA	NA	NA	NA	NA	NA	NA	NA	NA	NA	NA	NA	NA	NA	NA	NA	NA	NA
LineZero_b4	LineZero	before	350	NA	150	5250	4900	5250	1050	NA	NA	NA	NA	NA	NA	NA	NA	NA	NA	NA	NA	NA	NA	NA	NA	NA	NA	NA	NA	NA	NA	NA	NA	NA	NA	NA	NA	NA	NA	NA	NA	NA	NA
LineZero_b5	LineZero	before	300	NA	100	NA	NA	NA	1000	NA	NA	NA	NA	NA	NA	NA	NA	NA	NA	NA	NA	NA	NA	NA	NA	NA	NA	NA	NA	NA	NA	NA	NA	NA	NA	NA	NA	NA	NA	NA	NA	NA	NA
Luyeama_b1	Luyeama	before	250	NA	100	5950	6300	26250	450	NA	NA	NA	NA	NA	NA	NA	NA	NA	NA	NA	NA	NA	NA	NA	NA	NA	NA	NA	NA	NA	NA	NA	NA	NA	NA	NA	NA	NA	NA	NA	NA	NA	NA
Luyeama_b2	Luyeama	before	250	NA	100	5250	7000	5250	2800	NA	NA	NA	NA	NA	NA	NA	NA	NA	NA	NA	NA	NA	NA	NA	NA	NA	NA	NA	NA	NA	NA	NA	NA	NA	NA	NA	NA	NA	NA	NA	NA	NA	NA
Luyeama_b3	Luyeama	before	150	NA	50	3500	6000	7000	650	NA	NA	NA	NA	NA	NA	NA	NA	NA	NA	NA	NA	NA	NA	NA	NA	NA	NA	NA	NA	NA	NA	NA	NA	NA	NA	NA	NA	NA	NA	NA	NA	NA	NA
Luyeama_b4	Luyeama	before	250	NA	200	3000	8000	4000	2000	NA	NA	NA	NA	NA	NA	NA	NA	NA	NA	NA	NA	NA	NA	NA	NA	NA	NA	NA	NA	NA	NA	NA	NA	NA	NA	NA	NA	NA	NA	NA	NA	NA	NA
Luyeama_b5	Luyeama	before	300	NA	200	3000	8000	6000	1800	NA	NA	NA	NA	NA	NA	NA	NA	NA	NA	NA	NA	NA	NA	NA	NA	NA	NA	NA	NA	NA	NA	NA	NA	NA	NA	NA	NA	NA	NA	NA	NA	NA	NA
Gainkpai_MarriedCamp_b4	Gainkpai_MarriedCamp	before	300	NA	150	3500	5250	1000	1000	NA	NA	NA	NA	NA	NA	NA	NA	NA	NA	NA	NA	NA	NA	NA	NA	NA	NA	NA	NA	NA	NA	NA	NA	NA	NA	NA	NA	NA	NA	NA	NA	NA	NA
Nyannewliken_b1	Nyannewliken	before	300	20000	50	2500	3700	NA	NA	NA	NA	NA	NA	NA	NA	NA	NA	1300	NA	NA	700	NA	NA	NA	NA	NA	NA	NA	NA	NA	NA	NA	NA	NA	NA	NA	NA	NA	NA	NA	NA	NA	NA
Nyannewliken_b2	Nyannewliken	before	250	21000	50	2500	3500	NA	NA	NA	NA	NA	NA	NA	NA	NA	1250	NA	NA	NA	NA	NA	NA	NA	NA	NA	NA	NA	NA	NA	NA	NA	NA	NA	NA	NA	NA	NA	NA	NA	NA	NA	NA
Nyannewliken_b3	Nyannewliken	before	250	18000	50	2500	3000	NA	NA	NA	NA	NA	NA	NA	NA	NA	NA	1000	NA	NA	800	NA	NA	NA	NA	NA	NA	NA	NA	NA	NA	NA	NA	NA	NA	NA	NA	NA	NA	NA	NA	NA	NA
Nyannewliken_b4	Nyannewliken	before	250	28000	NA	2500	4000	NA	NA	NA	NA	NA	NA	NA	NA	NA	NA	1300	NA	NA	600	NA	NA	NA	NA	NA	NA	NA	NA	NA	NA	NA	NA	NA	NA	NA	NA	NA	NA	NA	NA	NA	NA
Nyenguita_b1	Nyenguita	before	250	NA	100	3000	4000	3500	700	NA	NA	NA	NA	NA	NA	NA	NA	NA	NA	NA	NA	NA	NA	NA	NA	NA	NA	NA	NA	NA	NA	NA	NA	NA	NA	NA	NA	NA	NA	NA	NA	NA	NA
Nyenguita_b2	Nyenguita	before	NA	NA	NA	NA	NA	NA	NA	NA	NA	NA	NA	NA	NA	NA	NA	NA	NA	NA	NA	NA	NA	NA	NA	NA	NA	NA	NA	NA	NA	NA	NA	NA	NA	NA	NA	NA	NA	NA	NA	NA	NA
Nyenguita_b3	Nyenguita	before	150	NA	250	NA	NA	NA	1500	NA	NA	NA	NA	NA	NA	NA	NA	NA	NA	NA	NA	NA	NA	NA	NA	NA	NA	NA	NA	NA	NA	NA	NA	NA	NA	NA	NA	NA	NA	NA	NA	NA	NA
Nyenguita_b4	Nyenguita	before	150	16500	200	NA	NA	NA	NA	NA	NA	NA	NA	NA	NA	NA	NA	NA	NA	NA	NA	NA	NA	NA	NA	NA	NA	NA	NA	NA	NA	NA	NA	NA	NA	NA	NA	NA	NA	NA	NA	NA	NA
Nyforta_b1	Nyforta	before	150	NA	70	1800	5600	2400	NA	1200	NA	NA	NA	NA	NA	NA	1250	NA	NA	NA	NA	NA	NA	NA	NA	NA	NA	NA	NA	NA	NA	NA	NA	NA	NA	NA	NA	NA	NA	NA	NA	NA	NA
Nyforta_b2	Nyforta	before	200	NA	25	NA	8400	NA	NA	NA	NA	NA	NA	NA	NA	NA	NA	NA	NA	NA	NA	NA	NA	NA	NA	NA	NA	NA	NA	NA	NA	NA	NA	NA	NA	NA	NA	NA	NA	NA	NA	NA	NA
Nyforta_b3	Nyforta	before	150	NA	25	NA	8400	NA	NA	NA	NA	NA	NA	NA	NA	NA	NA	NA	NA	NA	NA	NA	NA	NA	NA	NA	NA	NA	NA	NA	NA	NA	NA	NA	NA	NA	NA	NA	NA	NA	NA	NA	NA
Nyforta_b4	Nyforta	before	175	NA	80	2000	4500	2600	NA	NA	NA	NA	NA	NA	NA	NA	NA	1500	NA	NA	NA	NA	NA	NA	NA	NA	NA	NA	NA	NA	NA	NA	NA	NA	NA	NA	NA	NA	NA	NA	NA	NA	NA
Palala_b1	Palala	before	400	NA	20	3500	8750	3000	4000	NA	NA	NA	NA	NA	NA	NA	NA	NA	NA	NA	NA	NA	NA	NA	NA	NA	NA	NA	NA	NA	NA	NA	NA	NA	NA	NA	NA	NA	NA	NA	NA	NA	NA
Palala_b2	Palala	before	350	NA	25	NA	NA	150	NA	NA	NA	NA	NA	NA	NA	NA	NA	NA	NA	NA	NA	NA	NA	NA	NA	NA	NA	NA	NA	NA	NA	NA	NA	NA	NA	NA	NA	NA	NA	NA	NA	NA	NA
Palala_b3	Palala	before	350	NA	100	3500	7000	100	1200	NA	NA	NA	NA	NA	NA	NA	NA	NA	NA	NA	NA	NA	NA	NA	NA	NA	NA	NA	NA	NA	NA	NA	NA	NA	NA	NA	NA	NA	NA	NA	NA	NA	NA
Palala_b4	Palala	before	500	NA	350	NA	NA	NA	NA	NA	NA	NA	NA	NA	NA	NA	NA	NA	NA	NA	NA	NA	NA	NA	NA	NA	NA	NA	NA	NA	NA	NA	NA	NA	NA	NA	NA	NA	NA	NA	NA	NA	NA
Sayuo_b1	Sayuo	before	150	NA	100	2000	NA	NA	1000	NA	NA	NA	NA	NA	NA	NA	NA	NA	NA	NA	NA	NA	NA	NA	NA	NA	NA	NA	NA	NA	NA	NA	NA	NA	NA	NA	NA	NA	NA	NA	NA	NA	NA
Sayuo_b2	Sayuo	before	150	NA	NA	2500	NA	NA	NA	NA	NA	NA	NA	NA	NA	NA	NA	NA	NA	NA	NA	NA	NA	NA	NA	NA	NA	NA	NA	NA	NA	NA	NA	NA	NA	NA	NA	NA	NA	NA	NA	NA	NA
Sayuo_b3	Sayuo	before	200	NA	33	2500	4500	1500	350	NA	NA	NA	NA	NA	NA	NA	NA	NA	NA	NA	NA	NA	NA	NA	NA	NA	NA	NA	NA	NA	NA	NA	NA	NA	NA	NA	NA	NA	NA	NA	NA	NA	NA
Sayuo_b4	Sayuo	before	150	NA	16	3000	4000	NA	800	NA	NA	NA	NA	NA	NA	NA	NA	NA	NA	NA	NA	NA	NA	NA	NA	NA	NA	NA	NA	NA	NA	NA	NA	NA	NA	NA	NA	NA	NA	NA	NA	NA	NA
Sayuo_b5	Sayuo	before	250	NA	100	3000	NA	NA	800	NA	NA	NA	NA	NA	NA	NA	NA	NA	NA	NA	NA	NA	NA	NA	NA	NA	NA	NA	NA	NA	NA	NA	NA	NA	NA	NA	NA	NA	NA	NA	NA	NA	NA
Segisue_b1	Segisue	before	150	NA	50	NA	NA	NA	1000	NA	NA	NA	NA	NA	NA	NA	NA	NA	NA	NA	NA	NA	NA	NA	NA	NA	NA	NA	NA	NA	NA	NA	NA	NA	NA	NA	NA	NA	NA	NA	NA	NA	NA
Segisue_b2	Segisue	before	350	NA	100	NA	NA	NA	1400	NA	NA	NA	NA	NA	NA	NA	NA	NA	NA	NA	NA	NA	NA	NA	NA	NA	NA	NA	NA	NA	NA	NA	NA	NA	NA	NA	NA	NA	NA	NA	NA	NA	NA
Segisue_b3	Segisue	before	100	NA	NA	NA	NA	NA	800	NA	NA	NA	NA	NA	NA	NA	NA	NA	NA	NA	NA	NA	NA	NA	NA	NA	NA	NA	NA	NA	NA	NA	NA	NA	NA	NA	NA	NA	NA	NA	NA	NA	NA
Segisue_b4	Segisue	before	150	NA	100	1000	1500	NA	550	NA	NA	NA	NA	NA	NA	NA	NA	NA	NA	NA	NA	NA	NA	NA	NA	NA	NA	NA	NA	NA	NA	NA	NA	NA	NA	NA	NA	NA	NA	NA	NA	NA	NA
Segisue_b5	Segisue	before	250	NA	100	NA	NA	NA	550	NA	NA	NA	NA	NA	NA	NA	NA	NA	NA	NA	NA	NA	NA	NA	NA	NA	NA	NA	NA	NA	NA	NA	NA	NA	NA	NA	NA	NA	NA	NA	NA	NA	NA
Titiyen_b1	Titiyen	before	350	NA	NA	4000	6500	NA	1500	NA	NA	NA	NA	NA	NA	NA	NA	NA	NA	NA	NA	NA	NA	NA	NA	NA	NA	NA	NA	NA	NA	NA	NA	NA	NA	NA	NA	NA	NA	NA	NA	NA	NA
Titiyen_b2	Titiyen	before	350	NA	25	NA	6800	NA	2500	NA	NA	NA	NA	NA	NA	NA	NA	NA	NA	NA	NA	NA	NA	NA	NA	NA	NA	NA	NA	NA	NA	NA	NA	NA	NA	NA	NA	NA	NA	NA	NA	NA	NA
Titiyen_b3	Titiyen	before	NA	NA	20	4000	6800	NA	2600	NA	NA	NA	NA	NA	NA	NA	NA	NA	NA	NA	NA	NA	NA	NA	NA	NA	NA	NA	NA	NA	NA	NA	NA	NA	NA	NA	NA	NA	NA	NA	NA	NA	NA
Titiyen_b4	Titiyen	before	375	NA	20	3500	6000	NA	2500	NA	NA	NA	NA	NA	NA	NA	NA	NA	NA	NA	NA	NA	NA	NA	NA	NA	NA	NA	NA	NA	NA	NA	NA	NA	NA	NA	NA	NA	NA	NA	NA	NA	NA
Tohou_b1	Tohou	before	400	NA	NA	6000	3000	NA	1500	NA	NA	NA	NA	NA	NA	NA	NA	NA	NA	NA	NA	NA	NA	NA	NA	NA	NA	NA	NA	NA	NA	NA	NA	NA	NA	NA	NA	NA	NA	NA	NA	NA	NA
Tohou_b2	Tohou	before	350	NA	50	1500	2000	NA	450	NA	NA	NA	NA	NA	NA	NA	NA	NA	NA	NA	NA	NA	NA	NA	NA	NA	NA	NA	NA	NA	NA	NA	NA	NA	NA	NA	NA	NA	NA	NA	NA	NA	NA
Tohou_b3	Tohou	before	NA	NA	40	3000	NA	NA	NA	NA	NA	NA	NA	NA	NA	NA	NA	NA	NA	NA	NA	NA	NA	NA	NA	NA	NA	NA	NA	NA	NA	NA	NA	NA	NA	NA	NA	NA	NA	NA	NA	NA	NA
Tohou_b4	Tohou	before	350	NA	20	2500	NA	NA	NA	NA	NA	NA	NA	NA	NA	NA	NA	NA	NA	NA	NA	NA	NA	NA	NA	NA	NA	NA	NA	NA	NA	NA	NA	NA	NA	NA	NA	NA	NA	NA	NA	NA	NA
Tojallah_b1	Tojallah	before	150	NA	250	1500	NA	NA	1000	NA	NA	NA	NA	NA	NA	NA	NA	NA	NA	NA	NA	NA	NA	NA	NA	NA	NA	NA	NA	NA	NA	NA	NA	NA	NA	NA	NA	NA	NA	NA	NA	NA	NA
Tojallah_b2	Tojallah	before	150	NA	250	2500	NA	NA	1200	NA	NA	NA	NA	NA	NA	NA	NA	NA	NA	NA	NA	NA	NA	NA	NA	NA	NA	NA	NA	NA	NA	NA	NA	NA	NA	NA	NA	NA	NA	NA	NA	NA	NA
Tojallah_b3	Tojallah	before	150	NA	200	2500	NA	NA	NA	NA	200	NA	NA	NA	NA	NA	NA	NA	NA	NA	250	NA	NA	NA	NA	NA	NA	NA	NA	NA	NA	NA	NA	NA	NA	NA	NA	NA	NA	NA	NA	NA	NA
Tojallah_b4	Tojallah	before	250	NA	200	1500	NA	NA	850	NA	NA	NA	NA	NA	NA	NA	NA	NA	NA	NA	NA	NA	NA	NA	NA	NA	NA	NA	NA	NA	NA	NA	NA	NA	NA	NA	NA	NA	NA	NA	NA	NA	NA
Troyah_b1	Troyah	before	150	NA	30	3000	5250	NA	900	NA	NA	NA	NA	NA	NA	NA	NA	NA	NA	NA	NA	NA	NA	NA	NA	NA	NA	NA	NA	NA	NA	NA	NA	NA	NA	NA	NA	NA	NA	NA	NA	NA	NA
Troyah_b2	Troyah	before	150	NA	75	3000	7000	NA	750	NA	NA	NA	NA	NA	NA	NA	NA	NA	NA	NA	NA	NA	NA	NA	NA	NA	NA	NA	NA	NA	NA	NA	NA	NA	NA	NA	NA	NA	NA	NA	NA	NA	NA
Troyah_b3	Troyah	before	250	NA	175	3500	3000	NA	600	NA	NA	NA	NA	NA	NA	NA	NA	NA	NA	NA	NA	NA	NA	NA	NA	NA	NA	NA	NA	NA	NA	NA	NA	NA	NA	NA	NA	NA	NA	NA	NA	NA	NA
Troyah_b4	Troyah	before	350	NA	200	NA	NA	NA	600	NA	NA	NA	NA	NA	NA	NA	NA	NA	NA	NA	NA	NA	NA	NA	NA	NA	NA	NA	NA	NA	NA	NA	NA	NA	NA	NA	NA	NA	NA	NA	NA	NA	NA
Troyah_b5	Troyah	before	450	NA	250	3500	8750	NA	700	NA	NA	NA	NA	NA	NA	NA	NA	NA	NA	NA	NA	NA	NA	NA	NA	NA	NA	NA	NA	NA	NA	NA	NA	NA	NA	NA	NA	NA	NA	NA	NA	NA	NA
Wapi_b1	Wapi	before	200	NA	125	NA	NA	NA	1400	NA	NA	NA	NA	NA	NA	NA	NA	NA	NA	NA	NA	NA	NA	NA	NA	NA	NA	NA	NA	NA	NA	NA	NA	NA	NA	NA	NA	NA	NA	NA	NA	NA	NA
Wapi_b2	Wapi	before	250	NA	150	NA	NA	NA	NA	NA	NA	NA	NA	NA	NA	NA	NA	1300	NA	NA	NA	NA	NA	NA	NA	NA	NA	NA	NA	NA	NA	NA	NA	NA	NA	NA	NA	NA	NA	NA	NA	NA	NA
Warkpo_b1	Warkpo	before	200	NA	200	4500	NA	NA	800	NA	NA	NA	NA	NA	NA	NA	NA	NA	NA	NA	NA	NA	NA	NA	NA	NA	NA	NA	NA	NA	NA	NA	NA	NA	NA	NA	NA	NA	NA	NA	NA	NA	NA
Warkpo_b2	Warkpo	before	200	NA	175	5000	NA	NA	NA	NA	NA	NA	NA	NA	NA	NA	NA	NA	NA	NA	NA	NA	NA	NA	NA	NA	NA	NA	NA	NA	NA	NA	NA	NA	NA	NA	NA	NA	NA	NA	NA	NA	NA
Warkpo_b3	Warkpo	before	175	NA	175	4000	NA	NA	NA	900	NA	NA	NA	NA	NA	NA	NA	NA	NA	NA	NA	NA	NA	NA	NA	NA	NA	NA	NA	NA	NA	NA	NA	NA	NA	NA	NA	NA	NA	NA	NA	NA	NA
Warteken_b1	Warteken	before	450	41250	250	2500	NA	NA	2000	NA	NA	NA	NA	NA	NA	NA	NA	NA	NA	NA	NA	NA	NA	NA	NA	NA	NA	NA	NA	NA	NA	NA	NA	NA	NA	NA	NA	NA	NA	NA	NA	NA	NA
Warteken_b2	Warteken	before	NA	NA	NA	2500	4000	3000	1400	NA	NA	NA	NA	NA	NA	NA	NA	NA	NA	NA	NA	NA	NA	NA	NA	NA	NA	NA	NA	NA	NA	NA	NA	NA	NA	NA	NA	NA	NA	NA	NA	NA	NA
Warteken_b3	Warteken	before	300	NA	50	2000	3500	1500	1600	NA	NA	NA	NA	NA	NA	NA	NA	NA	NA	NA	NA	NA	NA	NA	NA	NA	NA	NA	NA	NA	NA	NA	NA	NA	NA	NA	NA	NA	NA	NA	NA	NA	NA
Warteken_b4	Warteken	before	350	34000	75	2500	4000	1700	100	NA	NA	NA	NA	NA	NA	NA	NA	NA	NA	NA	NA	NA	NA	NA	NA	NA	NA	NA	NA	NA	NA	NA	NA	NA	NA	NA	NA	NA	NA	NA	NA	NA	NA
Warteken_b5	Warteken	before	350	NA	80	2500	7000	1700	1800	NA	NA	NA	NA	NA	NA	NA	NA	NA	NA	NA	NA	NA	NA	NA	NA	NA	NA	NA	NA	NA	NA	NA	NA	NA	NA	NA	NA	NA	NA	NA	NA	NA	NA
Weamah_b1	Weamah	before	300	NA	67	NA	NA	NA	NA	NA	NA	NA	NA	NA	NA	NA	NA	NA	NA	NA	NA	NA	NA	NA	NA	NA	NA	NA	NA	NA	NA	NA	NA	NA	NA	NA	NA	NA	NA	NA	NA	NA	NA
Weamah_b2	Weamah	before	150	NA	NA	6000	NA	NA	NA	NA	NA	NA	NA	NA	NA	NA	1500	NA	NA	NA	300	NA	NA	NA	NA	NA	NA	NA	NA	NA	NA	NA	NA	NA	NA	NA	NA	NA	NA	NA	NA	NA	NA
Weamah_b3	Weamah	before	275	NA	150	NA	NA	NA	NA	NA	NA	NA	NA	NA	NA	NA	NA	NA	NA	NA	NA	NA	NA	NA	NA	NA	NA	NA	NA	NA	NA	NA	NA	NA	NA	NA	NA	NA	NA	NA	NA	NA	NA
Weamah_b4	Weamah	before	350	NA	NA	5000	7000	NA	NA	500	NA	NA	NA	NA	NA	NA	NA	NA	NA	NA	NA	NA	NA	NA	NA	NA	NA	NA	NA	NA	NA	NA	NA	NA	NA	NA	NA	NA	NA	NA	NA	NA	NA
Weamah_b5	Weamah	before	300	NA	125	NA	NA	NA	NA	850	NA	NA	NA	NA	NA	NA	NA	NA	NA	NA	NA	NA	NA	NA	NA	NA	NA	NA	NA	NA	NA	NA	NA	NA	NA	NA	NA	NA	NA	NA	NA	NA	NA
Welaken_b1	Welaken	before	250	NA	100	2800	3500	3500	NA	NA	NA	NA	NA	NA	NA	NA	NA	NA	NA	NA	NA	NA	NA	NA	NA	NA	NA	NA	NA	NA	NA	NA	NA	NA	NA	NA	NA	NA	NA	NA	NA	NA	NA
Welaken_b2	Welaken	before	300	NA	150	2800	4200	4000	NA	NA	NA	NA	NA	NA	NA	NA	NA	NA	NA	NA	NA	NA	NA	NA	NA	NA	NA	NA	NA	NA	NA	NA	NA	NA	NA	NA	NA	NA	NA	NA	NA	NA	NA
Yapa_b1	Yapa	before	350	NA	100	5250	7000	4000	600	NA	NA	NA	NA	NA	NA	NA	NA	NA	NA	NA	NA	NA	NA	NA	NA	NA	NA	NA	NA	NA	NA	NA	NA	NA	NA	NA	NA	NA	NA	NA	NA	NA	NA
Yapa_b2	Yapa	before	300	NA	50	4000	6000	5000	700	NA	NA	NA	NA	NA	NA	NA	NA	NA	NA	NA	NA	NA	NA	NA	NA	NA	NA	NA	NA	NA	NA	NA	NA	NA	NA	NA	NA	NA	NA	NA	NA	NA	NA
Yapa_b3	Yapa	before	250	NA	17	5250	7000	3500	NA	700	NA	NA	NA	NA	NA	NA	NA	NA	NA	NA	750	NA	NA	NA	NA	NA	NA	NA	NA	NA	NA	NA	NA	NA	NA	NA	NA	NA	NA	NA	NA	NA	NA
Yapa_b4	Yapa	before	250	NA	17	7000	10500	3000	750	NA	NA	NA	NA	NA	NA	NA	NA	NA	NA	NA	NA	NA	NA	NA	NA	NA	NA	NA	NA	NA	NA	NA	NA	NA	NA	NA	NA	NA	NA	NA	NA	NA	NA
Yapa_b5	Yapa	before	200	NA	17	NA	NA	2000	1400	NA	NA	NA	NA	NA	NA	NA	NA	NA	NA	NA	NA	NA	NA	NA	NA	NA	NA	NA	NA	NA	NA	NA	NA	NA	NA	NA	NA	NA	NA	NA	NA	NA	NA
ZahnTown_b1	ZahnTown	before	300	NA	NA	NA	NA	NA	2000	NA	NA	NA	NA	NA	NA	NA	NA	NA	NA	NA	NA	NA	NA	NA	NA	NA	NA	NA	NA	NA	NA	NA	NA	NA	NA	NA	NA	NA	NA	NA	NA	NA	NA
ZahnTown_b2	ZahnTown	before	350	NA	NA	NA	NA	NA	1500	NA	NA	NA	NA	NA	NA	NA	NA	NA	NA	NA	NA	NA	NA	NA	NA	NA	NA	NA	NA	NA	NA	NA	NA	NA	NA	NA	NA	NA	NA	NA	NA	NA	NA
ZahnTown_b3	ZahnTown	before	500	NA	175	1500	10500	NA	1600	NA	NA	NA	NA	NA	NA	NA	NA	NA	NA	NA	NA	NA	NA	NA	NA	NA	NA	NA	NA	NA	NA	NA	NA	NA	NA	NA	NA	NA	NA	NA	NA	NA	NA
ZahnTown_b4	ZahnTown	before	175	NA	25	4200	5250	NA	1500	NA	NA	NA	NA	NA	NA	NA	NA	NA	NA	NA	NA	NA	NA	NA	NA	NA	NA	NA	NA	NA	NA	NA	NA	NA	NA	NA	NA	NA	NA	NA	NA	NA	NA
ZahnTown_b5	ZahnTown	before	350	NA	25	3500	NA	NA	1500	NA	NA	NA	NA	NA	NA	NA	NA	NA	NA	NA	NA	NA	NA	NA	NA	NA	NA	NA	NA	NA	NA	NA	NA	NA	NA	NA	NA	NA	NA	NA	NA	NA	NA
Zao_b1	Zao	before	NA	NA	15	NA	NA	NA	NA	NA	NA	NA	NA	NA	NA	NA	NA	NA	NA	NA	NA	NA	NA	NA	NA	NA	NA	NA	NA	NA	NA	NA	NA	NA	NA	NA	NA	NA	NA	NA	NA	NA	NA
Zao_b2	Zao	before	250	NA	35	2500	3700	2500	450	NA	NA	NA	NA	NA	NA	NA	NA	NA	NA	NA	NA	NA	NA	NA	NA	NA	NA	NA	NA	NA	NA	NA	NA	NA	NA	NA	NA	NA	NA	NA	NA	NA	NA
Zao_b3	Zao	before	250	NA	35	1500	4500	2500	2000	NA	NA	NA	NA	NA	NA	NA	NA	NA	NA	NA	NA	NA	NA	NA	NA	NA	NA	NA	NA	NA	NA	NA	NA	NA	NA	NA	NA	NA	NA	NA	NA	NA	NA
Zawordamai_b1	Zawordamai	before	250	NA	150	2800	3500	NA	1500	NA	NA	NA	NA	NA	NA	NA	NA	NA	NA	NA	NA	NA	NA	NA	NA	NA	NA	NA	NA	NA	NA	NA	NA	NA	NA	NA	NA	NA	NA	NA	NA	NA	NA
Zawordamai_b2	Zawordamai	before	250	NA	250	3500	6300	NA	750	NA	NA	NA	NA	NA	NA	NA	NA	NA	NA	NA	NA	NA	NA	NA	NA	NA	NA	NA	NA	NA	NA	NA	NA	NA	NA	NA	NA	NA	NA	NA	NA	NA	NA
Zawordamai_b3	Zawordamai	before	250	NA	100	2000	6000	NA	800	NA	NA	NA	NA	NA	NA	NA	NA	NA	NA	NA	NA	NA	NA	NA	NA	NA	NA	NA	NA	NA	NA	NA	NA	NA	NA	NA	NA	NA	NA	NA	NA	NA	NA
Zawordamai_b4	Zawordamai	before	250	NA	100	4900	NA	NA	1000	NA	NA	NA	NA	NA	NA	NA	NA	NA	NA	NA	NA	NA	NA	NA	NA	NA	NA	NA	NA	NA	NA	NA	NA	NA	NA	NA	NA	NA	NA	NA	NA	NA	NA
Zawordamai_b5	Zawordamai	before	150	NA	100	200	NA	NA	NA	NA	NA	NA	NA	NA	NA	NA	NA	NA	NA	NA	NA	NA	NA	NA	NA	NA	NA	NA	NA	NA	NA	NA	NA	NA	NA	NA	NA	NA	NA	NA	NA	NA	NA
ZiahTown_b1	ZiahTown	before	500	NA	100	2500	4000	NA	1000	NA	NA	NA	NA	NA	NA	NA	NA	NA	NA	NA	NA	NA	NA	NA	NA	NA	NA	NA	NA	NA	NA	NA	NA	NA	NA	NA	NA	NA	NA	NA	NA	NA	NA
ZiahTown_b2	ZiahTown	before	500	28000	150	2500	10500	4200	1400	NA	NA	NA	NA	NA	NA	NA	NA	NA	NA	NA	NA	NA	NA	NA	NA	NA	NA	NA	NA	NA	NA	NA	NA	NA	NA	NA	NA	NA	NA	NA	NA	NA	NA
ZiahTown_b3	ZiahTown	before	250	NA	150	2000	2500	NA	NA	700	NA	NA	NA	NA	NA	NA	NA	1200	NA	NA	NA	NA	NA	NA	NA	NA	NA	NA	NA	NA	NA	4000	NA	NA	NA	NA	NA	NA	NA	NA	NA	NA	NA
ZiahTown_b4	ZiahTown	before	150	NA	50	2500	5000	NA	NA	NA	NA	NA	NA	NA	NA	NA	NA	NA	NA	NA	NA	NA	NA	NA	NA	NA	NA	NA	NA	NA	NA	NA	NA	NA	NA	NA	NA	NA	NA	NA	NA	NA	NA
ZiahTown_b5	ZiahTown	before	250	NA	450	2500	6000	NA	900	NA	NA	NA	NA	NA	NA	NA	NA	NA	NA	NA	NA	NA	NA	NA	NA	NA	NA	NA	NA	NA	NA	NA	NA	NA	NA	NA	NA	NA	NA	NA	NA	NA	NA
ZiahTown_b6	ZiahTown	before	300	NA	25	2000	5000	NA	1000	NA	NA	NA	NA	NA	NA	NA	NA	NA	NA	NA	NA	NA	NA	NA	NA	NA	NA	NA	NA	NA	NA	NA	NA	NA	NA	NA	NA	NA	NA	NA	NA	NA	NA
Zortapa_b1	Zortapa	before	400	NA	50	3000	4000	25000	NA	NA	NA	NA	NA	NA	NA	NA	2000	NA	NA	NA	NA	NA	NA	NA	NA	NA	NA	NA	NA	NA	NA	NA	NA	NA	NA	NA	NA	NA	NA	NA	NA	NA	NA
Zortapa_b2	Zortapa	before	325	NA	50	3500	7000	3500	NA	NA	NA	NA	NA	NA	400	NA	NA	NA	NA	NA	NA	NA	NA	NA	NA	NA	NA	NA	NA	NA	NA	NA	NA	NA	NA	NA	NA	NA	NA	NA	NA	NA	NA
